# Supplementary material for: Prolonged efficacy of Bifidobacterium lactis in the treatment of functional dyspepsia
Source: Research Square preprint supplement (doi:10.21203/rs.3.rs-2529681/v1), 2023-03-02
Supplement: Supplementary file 1 [file 2daa01fa22de1d796c82d76d.xlsx]

## Sheet: Table1
ID	Group	age	heigh	weigh	BMI	V1-Bloating	V1-Early satiety	V1-Epigastric pain	V1-Epigastric burning	V1-PDS	V1-EPS	V1-PDS+EPS
328	Placebo	56	1.78	98	30.9304	2	2	0	2	2	1	1.5
329	Placebo	60	1.68	75	29.2969	2	0	2	0	1	1	1
149	Placebo	32	1.7	80	31.25	3	3	3	3	3	3	3
151	Placebo	41	1.75	75	29.2969	3	3	3	3	3	3	3
152	Placebo	26	1.78	65	25.3906	3	3	3	3	3	3	3
156	Placebo	57	1.7	65	25.3906	3	3	3	3	3	3	3
210	Placebo	23	1.75	65	25.3906	2	0	2	0	1	1	1
211	Placebo	23	1.75	70	27.3438	2	2	0	0	2	0	1
213	Placebo	56	1.7	80	31.25	2	2	2	2	2	2	2
214	Placebo	35	1.75	73	28.5156	2	2	0	0	2	0	1
140	Placebo	48	1.63	72	27.0993	2	2	0	0	2	0	1
216	Placebo	36	1.85	150	29.2969	2	0	0	0	1	0	0.5
217	Placebo	47	1.5	54	21.0938	2	0	0	0	1	0	0.5
178	Placebo	30	1.63	54	20.32	1	0	0	1	0.5	0.5	0.5
183	Placebo	55	1.58	64	25.64	2	0	0	0	1	0	0.5
220	Placebo	45	0.59	70	27.3438	2	2	0	2	2	1	1.5
221	Placebo	60	1.63	69	26.9531	2	3	0	3	2.5	1.5	2
222	Placebo	59	1.6	58	22.6562	2	2	2	3	2	2.5	2.25
141	Placebo	38	1.5	60	26.6667	3	3	3	3	3	3	3
224	Placebo	56	1.6	60	23.4375	2	0	0	0	1	0	0.5
225	Placebo	60	1.57	46	17.9688	3	3	0	3	3	1.5	2.25
203	Placebo	50	1.8	85	26.23	2	2	2	2	2	2	2
227	Placebo	42	1.7	74	28.9062	3	0	0	0	1.5	0	0.75
228	Placebo	55	1.55	60	23.4375	0	2	0	2	1	1	1
229	Placebo	59	1.58	73	28.5156	3	3	2	0	3	1	2
230	Placebo	57	1.53	57	22.2656	2	2	2	2	2	2	2
231	Placebo	58	1.61	69	26.9531	3	3	2	3	3	2.5	2.75
232	Placebo	48	1.6	52	20.3125	0	2	0	2	1	1	1
233	Placebo	58	1.59	60	23.4375	2	3	0	3	2.5	1.5	2
207	Placebo	60	1.65	71	26.08	2	2	2	2	2	2	2
235	Placebo	57	1.6	70	27.3438	3	3	2	2	3	2	2.5
236	Placebo	45	1.69	75	29.2969	3	2	3	3	2.5	3	2.75
237	Placebo	58	1.58	60	23.4375	1	1	0	0	1	0	0.5
238	Placebo	39	1.6	80	31.25	2	2	0	0	2	0	1
239	Placebo	56	1.67	70	27.3438	0	2	0	3	1	1.5	1.25
240	Placebo	60	1.57	49	19.1406	3	0	2	2	1.5	2	1.75
142	Placebo	45	1.6	67	26.1719	3	3	3	3	3	3	3
143	Placebo	52	1.65	67	26.1719	2	0	0	2	1	1	1
144	Placebo	50	1.6	65	25.3906	1	2	1	0	1.5	0.5	1
318	Placebo	60	1.67	60	21.5139	2	2	2	2	2	2	2
319	Placebo	56	1.55	43	17.898	2	2	0	0	2	0	1
320	Placebo	60	1.6	55	21.4844	2	2	0	2	2	1	1.5
321	Placebo	57	1.6	53	21.0938	1	2	0	2	1.5	1	1.25
325	Placebo	55	1.6	70	27.3438	2	2	0	0	2	0	1
326	Placebo	43	1.56	48	18.75	2	2	0	0	2	0	1
157	Placebo	54	1.53	52	20.3125	2	0	0	1	1	0.5	0.75
158	Placebo	57	1.53	46	17.9688	3	3	3	3	3	3	3
159	Placebo	56	1.56	55	21.4844	3	3	3	3	3	3	3
160	Placebo	58	1.63	70	27.3438	1	1	1	0	1	0.5	0.75
330	Placebo	58	1.52	65	25.3906	2	0	0	0	1	0	0.5
172	Positive_control	60	1.72	70	27.3438	3	3	3	3	3	3	3
150	Positive_control	59	1.72	80	31.25	3	3	3	3	3	3	3
309	Positive_control	59	1.63	57	21.4536	2	2	2	2	2	2	2
333	Positive_control	59	1.53	49	19.5312	2	2	0	0	2	0	1
349	Positive_control	59	1.6	57	22.6562	2	2	2	2	2	2	2
351	Positive_control	59	1.66	77	30.0781	2	2	0	2	2	1	1.5
296	Positive_control	58	1.6	52	20.3125	2	2	2	3	2	2.5	2.25
304	Positive_control	58	1.6	60	23.4375	2	2	2	2	2	2	2
315	Positive_control	58	1.7	70	24.2215	2	2	2	2	2	2	2
316	Positive_control	58	1.75	90	29.3878	2	2	2	2	2	2	2
184	Positive_control	58	1.6	70	27.3438	3	3	3	3	3	3	3
249	Positive_control	58	1.62	80	31.25	2	2	2	0	2	1	1.5
336	Positive_control	58	1.52	55	21.4844	2	2	0	2	2	1	1.5
348	Positive_control	58	1.69	60	23.4375	2	2	2	0	2	1	1.5
365	Positive_control	58	1.6	75	29.2969	2	2	0	0	2	0	1
307	Positive_control	57	1.65	63	23.1405	2	2	0	0	2	0	1
317	Positive_control	57	1.57	61	24.7475	2	0	0	2	1	1	1
335	Positive_control	57	1.7	85	33.5938	2	2	0	0	2	0	1
344	Positive_control	57	1.55	51	20.0781	2	0	0	2	1	1	1
154	Positive_control	56	1.65	65	25.3906	3	2	3	3	2.5	3	2.75
299	Positive_control	56	1.57	45	18.2563	2	2	2	2	2	2	2
302	Positive_control	56	1.56	55	21.4844	2	2	0	0	2	0	1
310	Positive_control	56	1.6	55	21.4844	2	2	0	0	2	0	1
324	Positive_control	56	1.57	58	22.8516	2	2	2	2	2	2	2
346	Positive_control	56	1.67	67.8	26.5625	2	1	0	2	1.5	1	1.25
136	Positive_control	55	1.7	68	27.5873	2	2	2	2	2	2	2
306	Positive_control	55	1.56	60	24.6548	2	2	0	2	2	1	1.5
311	Positive_control	55	1.51	51	22.3674	0	2	2	0	1	1	1
345	Positive_control	55	1.56	44	17.3828	2	2	0	2	2	1	1.5
350	Positive_control	55	1.605	52	20.3125	2	2	0	2	2	1	1.5
308	Positive_control	54	1.6	65	25.3906	2	2	2	2	2	2	2
313	Positive_control	54	1.59	67	26.5021	2	2	0	0	2	0	1
347	Positive_control	54	1.78	62	32.0312	2	2	2	2	2	2	2
300	Positive_control	53	1.7	60	20.7612	2	2	0	2	2	1	1.5
215	Positive_control	52	1.56	51	20.9566	2	2	0	0	2	0	1
301	Positive_control	52	1.6	75	29.2969	2	2	0	0	2	0	1
352	Positive_control	52	1.58	65	26.9531	2	2	0	0	2	0	1
298	Positive_control	51	1.56	64	26.2985	2	2	2	2	2	2	2
137	Positive_control	49	1.63	70	27.3438	2	2	2	2	2	2	2
303	Positive_control	49	1.6	75	29.2969	0	2	2	2	1	2	1.5
148	Positive_control	47	1.63	66	25.7812	3	3	3	3	3	3	3
340	Positive_control	46	1.66	68	26.5625	2	2	0	3	2	1.5	1.75
175	Positive_control	45	1.6	55	21.4844	2	1	0	0	1.5	0	0.75
223	Positive_control	43	1.75	73	28.5156	2	0	2	0	1	1	1
357	Positive_control	42	1.67	65	25.3906	2	2	1	2	2	1.5	1.75
334	Positive_control	40	1.6	50	19.5312	2	2	0	0	2	0	1
332	Positive_control	36	1.62	65	25.3906	2	2	0	2	2	1	1.5
341	Positive_control	35	1.63	48	18.75	2	2	2	0	2	1	1.5
312	Positive_control	60	1.8	80	24.6914	2	2	0	2	2	1	1.5
342	Positive_control	60	1.65	60	23.4375	0	2	0	2	1	1	1
362	BL-99_low	59	1.65	68	26.5625	2	2	0	2	2	1	1.5
168	BL-99_low	59	1.56	52	21.3675	2	1	2	2	1.5	2	1.75
169	BL-99_low	50	1.6	61	23.8281	0	2	0	2	1	1	1
170	BL-99_low	57	1.58	65	25.3906	3	3	3	3	3	3	3
171	BL-99_low	52	1.6	75	29.2969	2	0	0	0	1	0	0.5
173	BL-99_low	58	1.65	70	27.3438	2	2	0	2	2	1	1.5
174	BL-99_low	51	1.6	70	27.3438	3	3	3	3	3	3	3
176	BL-99_low	41	1.69	65	25.3906	2	2	0	1	2	0.5	1.25
177	BL-99_low	58	1.75	80	31.25	3	3	3	3	3	3	3
180	BL-99_low	56	1.62	70	27.3438	2	2	0	2	2	1	1.5
181	BL-99_low	47	1.6	70	27.3438	2	3	2	2	2.5	2	2.25
182	BL-99_low	34	1.75	65	25.3906	3	3	3	3	3	3	3
163	BL-99_low	40	1.6	80	31.25	3	3	3	3	3	3	3
219	BL-99_low	59	1.72	80	31.25	1	1	0	3	1	1.5	1.25
241	BL-99_low	31	1.7	56	21.875	2	0	0	1	1	0.5	0.75
242	BL-99_low	54	1.55	70	29.1363	2	0	2	2	1	2	1.5
243	BL-99_low	24	1.7	72	28.125	0	2	0	0	1	0	0.5
245	BL-99_low	38	1.6	47	18.3594	2	2	0	0	2	0	1
246	BL-99_low	52	1.5	55	21.4844	2	2	2	0	2	1	1.5
247	BL-99_low	55	1.45	55	21.4844	2	2	2	0	2	1	1.5
164	BL-99_low	40	1.63	83	31.2394	1	1	2	2	1	2	1.5
248	BL-99_low	60	1.57	75	29.2969	2	2	2	2	2	2	2
226	BL-99_low	42	1.56	60	24.65	2	0	0	0	1	0	0.5
234	BL-99_low	58	1.7	68	23.53	2	2	2	2	2	2	2
252	BL-99_low	59	1.61	80	31.25	0	2	0	2	1	1	1
253	BL-99_low	44	1.8	85	33.2031	0	2	0	1	1	0.5	0.75
165	BL-99_low	57	1.6	51	19.9219	2	0	2	0	1	1	1
255	BL-99_low	60	1.65	65	25.3906	2	3	0	3	2.5	1.5	2
256	BL-99_low	58	1.64	60	23.4375	3	3	0	3	3	1.5	2.25
257	BL-99_low	59	1.7	60	23.4375	2	2	0	2	2	1	1.5
258	BL-99_low	55	1.7	85	29.4118	3	3	0	2	3	1	2
259	BL-99_low	46	1.58	55	21.4844	3	3	0	3	3	1.5	2.25
260	BL-99_low	58	1.58	62	24.2188	3	3	3	2	3	2.5	2.75
261	BL-99_low	48	1.56	56	21.875	2	0	0	0	1	0	0.5
262	BL-99_low	58	1.6	54	21.0938	2	2	0	2	2	1	1.5
263	BL-99_low	58	1.62	68	25.9107	0	3	0	0	1.5	0	0.75
264	BL-99_low	57	1.63	65	25.3906	2	2	2	2	2	2	2
265	BL-99_low	58	1.59	59	23.0469	3	3	0	2	3	1	2
266	BL-99_low	58	1.8	88	34.375	0	1	0	2	0.5	1	0.75
267	BL-99_low	60	1.62	89	34.7656	3	3	0	3	3	1.5	2.25
268	BL-99_low	59	1.52	50	19.5312	3	0	0	0	1.5	0	0.75
250	BL-99_low	49	1.66	52	18.87	1	2	2	0	1.5	1	1.25
166	BL-99_low	55	1.5	45	17.5781	3	3	3	3	3	3	3
355	BL-99_low	58	1.63	65	25.3906	2	2	2	0	2	1	1.5
358	BL-99_low	43	1.65	65	25.3906	2	2	2	2	2	2	2
359	BL-99_low	45	1.57	90	35.1562	2	2	0	0	2	0	1
360	BL-99_low	44	1.53	52	20.7031	2	2	0	0	2	0	1
167	BL-99_low	48	1.6	60	23.4375	2	2	2	2	2	2	2
361	BL-99_low	57	1.63	64	25.3906	2	2	0	0	2	0	1
364	BL-99_low	54	1.56	57	22.2656	2	2	2	2	2	2	2
192	BL-99_high	34	1.62	75	29.2969	3	3	3	3	3	3	3
393	BL-99_high	60	1.57	63	24.6094	2	2	2	2	2	2	2
193	BL-99_high	50	1.6	60	23.4375	2	2	1	2	2	1.5	1.75
194	BL-99_high	55	1.56	62	24.2188	3	2	2	3	2.5	2.5	2.5
195	BL-99_high	36	1.7	70	27.3438	3	3	3	3	3	3	3
199	BL-99_high	25	1.85	92	26.8809	3	3	3	3	3	3	3
200	BL-99_high	60	1.75	65	21.2245	3	3	1	3	3	2	2.5
201	BL-99_high	44	1.5	75	29.2969	3	3	3	3	3	3	3
251	BL-99_high	24	1.58	78	31.24	2	2	2	2	2	2	2
204	BL-99_high	57	1.73	73	28.5156	2	1	1	1	1.5	1	1.25
205	BL-99_high	48	1.6	80	31.25	3	3	3	3	3	3	3
186	BL-99_high	58	1.54	65	27.4077	3	3	3	3	3	3	3
269	BL-99_high	46	1.56	60	24.65	1	1	1	0	1	0.5	0.75
271	BL-99_high	60	1.5	52	20.3125	2	0	2	2	1	2	1.5
272	BL-99_high	42	1.66	65	25.3906	3	2	0	1	2.5	0.5	1.5
273	BL-99_high	41	1.59	63	24.9199	2	2	0	0	2	0	1
274	BL-99_high	36	1.83	75	29.2969	2	2	2	0	2	1	1.5
275	BL-99_high	59	1.5	48	21.3333	2	0	2	2	1	2	1.5
276	BL-99_high	45	1.73	75	29.2969	2	2	2	0	2	1	1.5
277	BL-99_high	27	1.6	48	18.75	2	0	0	0	1	0	0.5
278	BL-99_high	60	1.61	55	21.4844	2	2	0	0	2	0	1
279	BL-99_high	58	1.62	56	21.875	3	3	0	3	3	1.5	2.25
280	BL-99_high	57	1.59	68	26.5625	3	0	0	2	1.5	1	1.25
188	BL-99_high	30	1.6	50	19.5312	2	0	0	2	1	1	1
282	BL-99_high	58	1.65	50	18.3655	2	2	0	2	2	1	1.5
283	BL-99_high	58	1.66	57	20.6852	2	2	0	2	2	1	1.5
284	BL-99_high	57	1.52	52	22.5069	2	0	0	2	1	1	1
285	BL-99_high	58	1.58	64	25.6369	2	2	0	2	2	1	1.5
286	BL-99_high	56	1.58	55	22.0317	2	2	2	2	2	2	2
287	BL-99_high	58	1.66	82	29.7576	2	3	2	2	2.5	2	2.25
288	BL-99_high	58	1.6	70	27.3438	3	3	2	3	3	2.5	2.75
189	BL-99_high	48	1.55	75	29.2969	3	3	2	3	3	2.5	2.75
289	BL-99_high	59	1.6	52	20.3125	3	3	0	3	3	1.5	2.25
290	BL-99_high	57	1.75	100	32.6531	2	0	0	3	1	1.5	1.25
291	BL-99_high	59	1.63	57	21.4536	3	3	2	2	3	2	2.5
292	BL-99_high	55	1.65	60	22.0386	2	2	2	0	2	1	1.5
293	BL-99_high	58	1.56	55	22.6003	2	2	0	3	2	1.5	1.75
294	BL-99_high	58	1.6	70	27.3438	3	3	0	2	3	1	2
295	BL-99_high	59	1.74	75	24.7721	3	2	2	3	2.5	2.5	2.5
190	BL-99_high	33	1.6	61	23.8281	2	2	2	3	2	2.5	2.25
191	BL-99_high	54	1.63	63	24.6094	0	2	0	2	1	1	1
386	BL-99_high	60	1.55	64	25	2	2	2	2	2	2	2
387	BL-99_high	56	1.65	65	25.3906	2	2	2	2	2	2	2
391	BL-99_high	50	1.66	66	25.7812	2	2	2	2	2	2	2
392	BL-99_high	22	1.62	56	22.2656	0	2	2	0	1	1	1
388	BL-99_high	41	1.7	79	30.4688	2	2	2	2	2	2	2
389	BL-99_high	58	1.65	61	47.6562	2	2	0	1	2	0.5	1.25
373	BL-99_high	59	1.62	69	26.9531	2	2	2	2	2	2	2
374	BL-99_high	59	1.6	74	28.5156	2	2	2	2	2	2	2
202	BL-99_high	50	1.56	48	18.75	2	2	2	2	2	2	2

## Sheet: Table2
ID	Group	V1PGⅠ	V3PGⅠ	V4PGⅠ	V3PGⅠ-V1PGⅠ	V4PGⅠ-V3PGⅠ		V1PGⅡ	V3PGⅡ	V4PGⅡ	V3PGⅡ-V1PGⅡ	V4PGⅡ-V3PGⅡ		V1PGR	V3PGR	V4PGR	V3PGR-V1PGR	V4PGR-V3PGR		V1G17	V3G17	V4G17	V3G17-V1G17	V4G17-V3G17
328	Placebo	28.8	38.75	41.8	9.95	3.05		18	3.1	7.5	-14.9	4.4		1.6	12.5	5.57	10.9	-6.93		1.06	1.19	1.44	0.13	0.25
329	Placebo	67.2	67.53	15.4	0.33	-52.13		10	6.01	2.8	-3.99	-3.21		6.72	11.2363	5.50	4.51627	-5.73627		0.87	2.93	5.79	2.06	2.86
149	Placebo	56.2	55.4	64.3	-0.8	8.9		7.1	6.2	10.4	-0.9	4.2		7.91549	8.93548	6.18	1.01999	-2.75548		1.69	1.11	2.12	-0.58	1.01
151	Placebo	70.9	69.6	75.5	-1.3	5.9		5.5	6.6	9.9	1.1	3.3		12.8909	10.5455	7.63	-2.34545	-2.91545		4.56	8.84	24.11	4.28	15.27
152	Placebo	44.3	48.6	31.3	4.3	-17.3		8.8	10	7.1	1.2	-2.9		5.03409	4.86	4.41	-0.174091	-0.45		4.03	6.65	0.50	2.62	-6.15
156	Placebo	143.3	152.8	148.1	9.5	-4.7		15.9	17.6	17.0	1.7	-0.6		9.01258	8.68182	8.71	-0.33076	0.0281818		9.41	9.38	0.42	-0.03	-8.96
210	Placebo	65.7	79.8	70.1	14.1	-9.7		11.3	14.4	13.2	3.1	-1.2		5.81416	5.54167	5.31	-0.272493	-0.231667		4.44	4.8	2.30	0.36	-2.5
211	Placebo	21.7	43.9	41.0	22.2	-2.9		3.6	7.6	6.7	4	-0.9		6.02778	5.77632	6.12	-0.251462	0.343684		2.05	3.2	0.80	1.15	-2.4
213	Placebo	43.6	69.2	59.8	25.6	-9.4		7.8	14.9	12.2	7.1	-2.7		5.58974	4.6443	4.90	-0.945448	0.255705		10.94	11	0.10	0.06	-10.9
214	Placebo	65.2	62.9	62.9	-2.3	0		6.8	8.8	8.7	2	-0.1		9.58824	7.14773	7.23	-2.44051	0.0822727		11.48	11.7	0.18	0.22	-11.52
140	Placebo	66.9	38.5	63.0	-28.4	24.5		10.8	7.7	10.7	-3.1	3		6.19444	5	5.89	-1.19444	0.89		11.14	10.35	0.75	-0.79	-9.6
216	Placebo	43.1	49	47.5	5.9	-1.5		2	7.1	5.3	5.1	-1.8		21.55	6.90141	8.96	-14.6486	2.05859		1.41	1.1	2.25	-0.31	1.15
217	Placebo	61.5	39.6	41.0	-21.9	1.4		13.1	5.7	5.3	-7.4	-0.4		4.69466	6.94737	7.74	2.25271	0.792632		2.62	3.2	2.73	0.58	-0.47
178	Placebo	NA	NA	NA	#VALUE!	#VALUE!		NA	NA	NA	#VALUE!	#VALUE!		NA	NA	NA	#VALUE!	#VALUE!		NA	NA	NA	#VALUE!	#VALUE!
183	Placebo	NA	NA	NA	#VALUE!	#VALUE!		NA	NA	NA	#VALUE!	#VALUE!		NA	NA	NA	#VALUE!	#VALUE!		NA	NA	NA	#VALUE!	#VALUE!
220	Placebo	NA	NA	NA	#VALUE!	#VALUE!		NA	NA	NA	#VALUE!	#VALUE!		4.94872	4.34409	4.07	-0.604632	-0.274086		2.11	NA	4.84	#VALUE!	#VALUE!
221	Placebo	NA	NA	NA	#VALUE!	#VALUE!		NA	NA	NA	#VALUE!	#VALUE!		4.6652	4.49248	4.80	-0.172717	0.307519		2.35	NA	29.69	#VALUE!	#VALUE!
222	Placebo	50.8	57.5	47.7	6.7	-9.8		9.1	10.7	8.2	1.6	-2.5		5.58242	5.37383	5.82	-0.208586	0.446168		1.74	2	3.93	0.26	1.93
141	Placebo	40.6	83	27.9	42.4	-55.1		4.3	5.4	4.6	1.1	-0.8		9.44186	15.3704	6.07	5.92851	-9.30037		2.71	1.65	1.63	-1.06	-0.02
224	Placebo	NA	NA	NA	#VALUE!	#VALUE!		NA	NA	NA	#VALUE!	#VALUE!		NA	NA	NA	#VALUE!	#VALUE!		NA	NA	NA	#VALUE!	#VALUE!
225	Placebo	NA	NA	NA	#VALUE!	#VALUE!		NA	NA	NA	#VALUE!	#VALUE!		4.94355	2.25	5.18	-2.69355	2.93		3.89	NA	3.44	#VALUE!	#VALUE!
203	Placebo	NA	NA	NA	#VALUE!	#VALUE!		NA	NA	NA	#VALUE!	#VALUE!		NA	NA	NA	#VALUE!	#VALUE!		NA	NA	NA	#VALUE!	#VALUE!
227	Placebo	NA	NA	NA	#VALUE!	#VALUE!		NA	NA	NA	#VALUE!	#VALUE!		5.02308	4.99206	4.41	-0.0310134	-0.582063		2.85	NA	4.07	#VALUE!	#VALUE!
228	Placebo	51.5	52.6	52.3	1.1	-0.3		6	8.1	7.4	2.1	-0.7		8.58333	6.49383	7.07	-2.08951	0.576173		2.45	3.4	4.11	0.95	0.71
229	Placebo	39.5	35.4	33.7	-4.1	-1.7		6.4	6.6	6.5	0.2	-0.1		6.17188	5.36364	5.18	-0.808239	-0.183636		2.04	1.1	1.49	-0.94	0.39
230	Placebo	66.5	75	57.7	8.5	-17.3		10.3	24	19.6	13.7	-4.4		6.45631	3.125	2.94	-3.33131	-0.185		2.32	3.9	2.71	1.58	-1.19
231	Placebo	98.7	84.2	71.0	-14.5	-13.2		21.5	12.9	10.3	-8.6	-2.6		4.5907	6.52713	6.89	1.93643	0.362868		3.53	3.7	9.62	0.17	5.92
232	Placebo	82.8	92.6	72.1	9.8	-20.5		13.1	14.4	12.0	1.3	-2.4		6.32061	6.43056	6.01	0.109945	-0.420556		11.68	11.5	0.27	-0.18	-11.23
233	Placebo	15.6	57.8	57.6	42.2	-0.2		5.3	9	8.4	3.7	-0.6		2.9434	6.42222	6.86	3.47883	0.437778		4.26	5.3	0.93	1.04	-4.37
207	Placebo	99.6	104.5	83.2	4.9	-21.3		28.7	29.6	23.5	0.9	-6.1		3.47038	3.53041	3.54	0.0600221	0.00959459		9.09	8.8	1.50	-0.29	-7.3
235	Placebo	62	64.9	54.8	2.9	-10.1		12.2	13.6	11.5	1.4	-2.1		5.08197	4.77206	4.77	-0.309908	-0.00205882		4.77	3.7	1.55	-1.07	-2.15
236	Placebo	40.8	38.5	41.8	-2.3	3.3		11.6	12.8	12.2	1.2	-0.6		3.51724	3.00781	3.43	-0.509429	0.422187		6.5	2.7	3.56	-3.8	0.86
237	Placebo	53.5	53.9	50.5	0.4	-3.4		8.6	9.9	9.2	1.3	-0.7		6.22093	5.44444	5.49	-0.776486	0.0455556		5.84	8.5	5.52	2.66	-2.98
238	Placebo	70	83.2	92.9	13.2	9.7		18.7	24.1	26.6	5.4	2.5		3.74332	3.45228	3.49	-0.291033	0.0377178		12.53	13.2	0.80	0.67	-12.4
239	Placebo	124.6	102	118.0	-22.6	16		36.3	38	31.0	1.7	-7		3.43251	2.68421	3.81	-0.748296	1.12579		11.51	11.4	32.94	-0.11	21.54
240	Placebo	80	98.4	84.9	18.4	-13.5		23.1	31.1	25.8	8	-5.3		3.4632	3.16399	3.29	-0.299216	0.126013		9.65	6.1	4.80	-3.55	-1.3
142	Placebo	61.5	47.3	67.1	-14.2	19.8		8.8	7.7	9.7	-1.1	2		6.98864	6.14286	6.92	-0.845779	0.777143		4.02	2.2	2.98	-1.82	0.78
143	Placebo	45.7	48.1	37.1	2.4	-11		4.6	2.4	7.3	-2.2	4.9		9.93478	20.0417	5.08	10.1069	-14.9617		0.57	3.18	4.98	2.61	1.8
144	Placebo	49.2	23.3	53.2	-25.9	29.9		7.9	7.6	9.3	-0.3	1.7		6.22785	3.06579	5.72	-3.16206	2.65421		10.7	10.46	0.56	-0.24	-9.9
318	Placebo	44.4	53.58	14.3	9.18	-39.28		9.5	3.94	3.6	-5.56	-0.34		4.67368	13.599	3.97	8.9253	-9.62898		4.31	2.17	4.44	-2.14	2.27
319	Placebo	71.1	93.84	23.7	22.74	-70.14		12.2	7.87	5.3	-4.33	-2.57		5.82787	11.9238	4.47	6.09589	-7.45376		2.24	1.57	3.49	-0.67	1.92
320	Placebo	69.9	24.45	29.2	-45.45	4.75		16.3	9.9	8.5	-6.4	-1.4		4.28834	2.4697	3.44	-1.81865	0.970303		10.09	10.06	1.92	-0.03	-8.14
321	Placebo	89.4	73.87	29.1	-15.53	-44.77		27	5.61	5.9	-21.39	0.29		3.31111	13.1676	4.93	9.85645	-8.23756		1.03	0.7	1.72	-0.33	1.02
325	Placebo	43.7	94.35	27.6	50.65	-66.75		7.7	10.41	5.1	2.71	-5.31		5.67532	9.0634	5.41	3.38808	-3.6534		2.2	3.87	1.76	1.67	-2.11
326	Placebo	68.5	65.82	45.0	-2.68	-20.82		13.4	5.26	8.2	-8.14	2.94		5.11194	12.5133	5.49	7.40137	-7.02331		1.73	1.94	2.34	0.21	0.4
157	Placebo	46.6	58.1	59.9	11.5	1.8		6.3	6.2	7.9	-0.1	1.7		7.39683	9.37097	7.58	1.97414	-1.79097		2.18	4.15	3.86	1.97	-0.29
158	Placebo	73.1	83	92.9	9.9	9.9		8.4	10	12.2	1.6	2.2		8.70238	8.3	7.61	-0.402381	-0.69		0.67	0.71	0.74	0.04	0.03
159	Placebo	66.7	63.8	36.8	-2.9	-27		9.1	28.03	5.7	18.93	-22.33		7.32967	2.27613	6.46	-5.05354	4.18387		10.82	10.89	0.83	0.07	-10.06
160	Placebo	49.7	61.56	24.4	11.86	-37.16		9.1	9.99	5.3	0.89	-4.69		5.46154	6.16216	4.60	0.700624	-1.56216		10.05	13.71	15.59	3.66	1.88
330	Placebo	57.2	89.2	25.4	32	-63.8		10.3	13.72	5.0	3.42	-8.72		5.5534	6.50146	5.08	0.94806	-1.42146		6.98	13.68	3.48	6.7	-10.2
172	Positive_control	79.1	81.33	19.6	2.23	-61.73		12.2	7.66	3.2	-4.54	-4.46		6.48361	10.6175	6.13	4.13389	-4.48749		7.64	2.84	6.51	-4.8	3.67
150	Positive_control	92.9	85.98	44.1	-6.92	-41.88		27.4	8.47	6.0	-18.93	-2.47		3.39051	10.1511	7.35	6.76061	-2.80112		2.09	0.76	1.46	-1.33	0.7
309	Positive_control	43.6	60.85	18.4	17.25	-42.45		6.9	22.7	3.7	15.8	-19		6.31884	2.68062	4.97	-3.63822	2.28938		1.22	1.4	2.17	0.18	0.77
333	Positive_control	48.3	66.74	33.0	18.44	-33.74		5.2	36.7	4.3	31.5	-32.4		9.28846	1.81853	7.67	-7.46993	5.85147		7.35	1.43	6.48	-5.92	5.05
349	Positive_control	55.6	74.88	38.0	19.28	-36.88		9.7	4.6	5.3	-5.1	0.7		5.73196	16.2783	7.17	10.5463	-9.10826		3.66	2.67	2.21	-0.99	-0.46
351	Positive_control	50	73.8	46.7	23.8	-27.1		5	2	5.9	-3	3.9		10	36.9	7.92	26.9	-28.98		1.67	2.07	3.16	0.4	1.09
296	Positive_control	92.1	94	86.9	1.9	-7.1		11.6	12.3	10.3	0.7	-2		7.93966	7.64228	8.44	-0.297379	0.797724		1.17	1.3	0.10	0.13	-1.2
304	Positive_control	7	55.7	6.3	48.7	-49.4		15.7	14.19	6.3	-1.51	-7.89		0.44586	3.9253	1.00	3.47944	-2.9253					0	0
315	Positive_control	69.3	120.32	34.6	51.02	-85.72		11.5	11.86	7.1	0.36	-4.76		6.02609	10.145	4.87	4.11894	-5.27503		1.04	5.16	1.41	4.12	-3.75
316	Positive_control	63.8	94.23	94.23	30.43	0		13.8	6.25	6.25	-7.55	0		4.62319	15.0768	15.08	10.4536	0.0032		1.17	7.57	7.57	6.4	0
184	Positive_control	65.3	82.73	30.6	17.43	-52.13		9.2	3.99	4.5	-5.21	0.51		7.09783	20.7343	6.80	13.6365	-13.9343		1.59	2.51	2.86	0.92	0.35
249	Positive_control	80.7	47.21	30.5	-33.49	-16.71		18.4	5.84	7.7	-12.56	1.86		4.38587	8.0839	3.96	3.69803	-4.1239		11.23	13.55	6.82	2.32	-6.73
336	Positive_control	45.6	101.16	18.6	55.56	-82.56		8.1	11.89	3.2	3.79	-8.69		5.62963	8.50799	5.81	2.87836	-2.69799		0.87	3.63	4.91	2.76	1.28
348	Positive_control	123.8	67.34	64.6	-56.46	-2.74		35.3	6.13	20.6	-29.17	14.47		3.50708	10.9853	3.14	7.47824	-7.84532		9.29	1.94	8.05	-7.35	6.11
365	Positive_control	110.8	122.1	182.5	11.3	60.4		22.5	9.6	16.9	-12.9	7.3		4.92444	12.7188	10.80	7.79431	-1.91875		10.55	10.67	1.46	0.12	-9.21
307	Positive_control	74.3	80.45	37.2	6.15	-43.25		13.2	4.32	7.6	-8.88	3.28		5.62879	18.6227	4.89	12.9939	-13.7327		1.65	0.48	5.82	-1.17	5.34
317	Positive_control	93.3	83.8	71.3	-9.5	-12.5		24.1	40.57	17.9	16.47	-22.67		3.87137	2.06557	3.98	-1.8058	1.91443		1.19	2.95	13.54	1.76	10.59
335	Positive_control	76.3	88.99	39.7	12.69	-49.29		18.2	5.46	10.7	-12.74	5.24		4.19231	16.2985	3.71	12.1062	-12.5885		5.54	1.98	3.84	-3.56	1.86
344	Positive_control	76.5	85.54	37.9	9.04	-47.64		11.4	31.49	6.1	20.09	-25.39		6.71053	2.71642	6.21	-3.99411	3.49358		11.15	11.47	1.46	0.32	-10.01
154	Positive_control	41.2	113.26	30.5	72.06	-82.76		8.8	12.8	4.7	4	-8.1		4.68182	8.84844	6.49	4.16662	-2.35844		1.01	5.99	2.07	4.98	-3.92
299	Positive_control	41.5	35.9	45.4	-5.6	9.5		9.9	7.5	11.1	-2.4	3.6		4.19192	4.78667	4.09	0.594747	-0.696667		6.66	7.47	8.13	0.81	0.66
302	Positive_control	79.4	76.96	25.6	-2.44	-51.36		14.9	4.73	5.1	-10.17	0.37		5.32886	16.2706	5.02	10.9418	-11.2506		1.12	1.63	1.26	0.51	-0.37
310	Positive_control	49.9	74.26	19.2	24.36	-55.06		7.7	9.93	3.0	2.23	-6.93		6.48052	7.47835	6.40	0.997829	-1.07835		3.78	3.87	22.24	0.09	18.37
324	Positive_control	76.8	159.04	25.2	82.24	-133.84		12.5	12.9	5.2	0.4	-7.7		6.144	12.3287	4.85	6.18468	-7.47868		2.01	4.63	2.38	2.62	-2.25
346	Positive_control	125	107.15	53.6	-17.85	-53.55		24.1	6.25	11.9	-17.85	5.65		5.18672	17.144	4.50	11.9573	-12.644		1.53	2.54	4.24	1.01	1.7
136	Positive_control	72.1	62.78	32.6	-9.32	-30.18		12.6	9.12	6.2	-3.48	-2.92		5.72222	6.88377	5.26	1.16155	-1.62377		1.81	1.1	0.82	-0.71	-0.28
306	Positive_control	65.4	35	27.9	-30.4	-7.1		8.2	17.9	4.3	9.7	-13.6		7.97561	1.95531	6.49	-6.0203	4.53469		1.85	4.3	1.72	2.45	-2.58
311	Positive_control	72.2	93.8	38.2	21.6	-55.6		9.6	5.12	5.3	-4.48	0.18		7.52083	18.3203	7.21	10.7995	-11.1103		5.9	10	13.39	4.1	3.39
345	Positive_control	105.9	106.4	114.7	0.5	8.3		27.8	10.58	16.5	-17.22	5.92		3.80935	10.0567	6.95	6.24736	-3.10671					0	0
350	Positive_control	96.5	88.4	89.5	-8.1	1.1		31.9	25.4	26.1	-6.5	0.7		3.02508	3.48031	3.43	0.455237	-0.050315		3.92	3	3.56	-0.92	0.56
308	Positive_control	55.8	83.7	29.8	27.9	-53.9		16.7	5.75	8.1	-10.95	2.35		3.34132	14.5565	3.68	11.2152	-10.8765		4.53	2.45	3.36	-2.08	0.91
313	Positive_control	48	83.64	23.3	35.64	-60.34		6.2	5.43	3.1	-0.77	-2.33		7.74194	15.4033	7.52	7.66138	-7.88331		1.51	8.47	3.75	6.96	-4.72
347	Positive_control	66.8	99.83	52.7	33.03	-47.13		9.5	4.99	6.8	-4.51	1.81		7.03158	20.006	7.75	12.9744	-12.256					0	0
300	Positive_control	54.8	65.1	66.3	10.3	1.2		7.6	7.4	9.6	-0.2	2.2		7.21053	8.7973	6.91	1.58677	-1.8873		0.62	0.74	1.01	0.12	0.27
215	Positive_control	75.5	76.88	36.8	1.38	-40.08		11.5	5.99	5.3	-5.51	-0.69		6.56522	12.8347	6.94	6.26951	-5.89472		0.68	1.53	2.18	0.85	0.65
301	Positive_control	77.1	72.6	86.2	-4.5	13.6		8.9	8	10.1	-0.9	2.1		8.66292	9.075	8.53	0.412079	-0.545		1.33	5.31	0.56	3.98	-4.75
352	Positive_control	56	55.9	24.5	-0.1	-31.4		8.8	6.03	4.0	-2.77	-2.03		6.36364	9.27032	6.13	2.90668	-3.14032		1.56	2.48	2.22	0.92	-0.26
298	Positive_control	24.6	29.2	64.3	4.6	35.1		31.9	7.3	9.1	-24.6	1.8		0.77116	4	7.07	3.22884	3.07		11.69	12.88	6.73	1.19	-6.15
137	Positive_control	60.1	67.5	82.4	7.4	14.9		6.9	8.5	10.1	1.6	1.6		8.71014	7.94118	8.16	-0.768968	0.218824		1.6	2.8	8.23	1.2	5.43
303	Positive_control	69.7	127.22	25.3	57.52	-101.92		19.9	14.94	8.3	-4.96	-6.64		3.50251	8.51539	3.05	5.01288	-5.46539		8.85	4.5	8.89	-4.35	4.39
148	Positive_control	34	76.06	17.3	42.06	-58.76		4.4	6.7	2.4	2.3	-4.3		7.72727	11.3522	7.21	3.62497	-4.14224		0.69	2.25	2.18	1.56	-0.07
340	Positive_control	NA	NA	NA	#VALUE!	#VALUE!		15.8	13.39	13.39	-2.41	0		2.43038	4.03361	11.50	1.60323	7.46639		2.66	9.67	9.67	7.01	0
175	Positive_control	55.8	90.13	28.1	34.33	-62.03		13	6.78	7.0	-6.22	0.22		4.29231	13.2935	4.01	9.0012	-9.28351		2.41	1	2.78	-1.41	1.78
223	Positive_control	53.2	69.67	26.5	16.47	-43.17		9.7	6.33	5.7	-3.37	-0.63		5.48454	11.0063	4.65	5.52178	-6.35632		1.36	1.31	2.93	-0.05	1.62
357	Positive_control	NA	NA	NA	#VALUE!	#VALUE!		NA	NA	NA	#VALUE!	#VALUE!		NA	NA	NA	#VALUE!	#VALUE!		NA	NA	NA	#VALUE!	#VALUE!
334	Positive_control	36.8	54.1	38.5	17.3	-15.6		6.5	3.3	7.2	-3.2	3.9		5.66154	16.3939	5.35	10.7324	-11.0439		2.88	11.32	1.12	8.44	-10.2
332	Positive_control	48.5	57.1	59.3	8.6	2.2		5.5	4.7	6.4	-0.8	1.7		8.81818	12.1489	9.27	3.33075	-2.87894		4.31	12.2	4.04	7.89	-8.16
341	Positive_control	NA	NA	NA	#VALUE!	#VALUE!		NA	NA	NA	#VALUE!	#VALUE!		NA	NA	NA	#VALUE!	#VALUE!		NA	NA	NA	#VALUE!	#VALUE!
312	Positive_control	64.2	43.7	61.0	-20.5	17.3		10.7	9.3	10.0	-1.4	0.7		6	4.69892	6.10	-1.30108	1.40108		6.42	10.55	1.60	4.13	-8.95
342	Positive_control	115.3	46.8	92.9	-68.5	46.1		21.7	18.9	21.3	-2.8	2.4		5.31336	2.47619	4.36	-2.83717	1.88381		1.92	9.5	8.98	7.58	-0.52
362	BL-99_low	108.7	42.1	51.8	-66.6	9.7		15.6	7.5	8.3	-8.1	0.8		6.96795	5.61333	6.24	-1.35462	0.626667		3.34	2.16	1.89	-1.18	-0.27
168	BL-99_low	41.2	72.8	65.0	31.6	-7.8		11.1	11.2	17.0	0.1	5.8		3.71171	6.5	3.82	2.78829	-2.68		1.58	1.56	5.26	-0.02	3.7
169	BL-99_low	72.3	80.7	124.6	8.4	43.9		8.8	9.1	19.0	0.3	9.9		8.21591	8.86813	6.56	0.652223	-2.30813		7.2	8.04	14.64	0.84	6.6
170	BL-99_low	60.9	41.5	59.2	-19.4	17.7		9.4	10.6	11.2	1.2	0.6		6.47872	3.91509	5.29	-2.56363	1.37491		1.15	1.66	1.70	0.51	0.04
171	BL-99_low	63.3	45.3	87.9	-18	42.6		24.4	20.6	12.8	-3.8	-7.8		2.59426	2.19903	6.87	-0.395233	4.67097		0.12	3.88	0.59	3.76	-3.29
173	BL-99_low	51.4	52.7	50.1	1.3	-2.6		8.2	7.5	9.2	-0.7	1.7		6.26829	7.02667	5.45	0.758374	-1.57667		3.05	12.24	3.27	9.19	-8.97
174	BL-99_low	NA	NA	NA	#VALUE!	#VALUE!		NA	NA	NA	#VALUE!	#VALUE!		NA	NA	NA	#VALUE!	#VALUE!		NA	NA	NA	#VALUE!	#VALUE!
176	BL-99_low	45.3	59.7	54.1	14.4	-5.6		17	11	8.7	-6	-2.3		2.66471	5.42727	6.22	2.76257	0.792727		1.97	1.9	0.66	-0.07	-1.24
177	BL-99_low	NA	NA	NA	#VALUE!	#VALUE!		NA	NA	NA	#VALUE!	#VALUE!		NA	NA	NA	#VALUE!	#VALUE!		NA	NA	NA	#VALUE!	#VALUE!
180	BL-99_low	38.2	39.2	39.9	1	0.7		9.3	11.1	10.7	1.8	-0.4		4.10753	3.53153	3.73	-0.575995	0.198468		8.68	12.3	2.95	3.62	-9.35
181	BL-99_low	73.6	79.9	88.9	6.3	9		10.9	11.9	12.6	1	0.7		6.75229	6.71429	7.06	-0.0380079	0.345714		3.55	2.6	4.61	-0.95	2.01
182	BL-99_low	56.2	58.6	50.7	2.4	-7.9		9.2	11.2	9.2	2	-2		6.1087	5.23214	5.51	-0.876553	0.277857		4.56	3.9	2.16	-0.66	-1.74
163	BL-99_low	46.9	51.5	51.6	4.6	0.1		19.5	13.7	9.5	-5.8	-4.2		2.40513	3.75912	5.43	1.354	1.67088		3.39	2.9	1.34	-0.49	-1.56
219	BL-99_low	NA	NA	NA	#VALUE!	#VALUE!		NA	NA	NA	#VALUE!	#VALUE!		NA	NA	NA	#VALUE!	#VALUE!		NA	NA	NA	#VALUE!	#VALUE!
241	BL-99_low	58.2	58.5	59.4	0.3	0.9		11	10.9	10.2	-0.1	-0.7		5.29091	5.36697	5.82	0.0760634	0.453028		1.18	1.6	0.10	0.42	-1.5
242	BL-99_low	53.6	57.8	61.3	4.2	3.5		9.5	10.8	10.8	1.3	0		5.64211	5.35185	5.68	-0.290253	0.328148		4.32	9.2	1.30	4.88	-7.9
243	BL-99_low	NA	NA	NA	#VALUE!	#VALUE!		NA	NA	NA	#VALUE!	#VALUE!		NA	NA	NA	#VALUE!	#VALUE!		NA	NA	NA	#VALUE!	#VALUE!
245	BL-99_low	61.9	67.3	70.4	5.4	3.1		11	15.2	14.5	4.2	-0.7		5.62727	4.42763	4.86	-1.19964	0.432368		8.87	5.4	14.37	-3.47	8.97
246	BL-99_low	15.5	14.5	14.6	-1	0.1		4.1	4.8	4.6	0.7	-0.2		3.78049	3.02083	3.17	-0.759654	0.149167		4.16	8.1	8.23	3.94	0.13
247	BL-99_low	63.9	31.4	61.7	-32.5	30.3		10	10.6	13.3	0.6	2.7		6.39	2.96226	4.64	-3.42774	1.67774		5.2	9.26	1.46	4.06	-7.8
164	BL-99_low	105.4	133.3	99.4	27.9	-33.9		27.4	27.3	17.8	-0.1	-9.5		3.84672	4.88278	5.58	1.03607	0.697216		9.79	11.1	9.13	1.31	-1.97
248	BL-99_low	77.3	70.9	68.0	-6.4	-2.9		24.5	22.1	22.9	-2.4	0.8		3.1551	3.20814	2.97	0.0530428	-0.238145		12.39	14.1	5.77	1.71	-8.33
226	BL-99_low	44.3	39.6	36.0	-4.7	-3.6		8.8	8.9	7.6	0.1	-1.3		5.03409	4.44944	4.74	-0.584653	0.290562		4.6	7.2	1.42	2.6	-5.78
234	BL-99_low	NA	NA	NA	#VALUE!	#VALUE!		NA	NA	NA	#VALUE!	#VALUE!		NA	NA	NA	#VALUE!	#VALUE!		NA	NA	NA	#VALUE!	#VALUE!
252	BL-99_low	57.8	51.3	46.7	-6.5	-4.6		8.8	8.3	7.6	-0.5	-0.7		6.56818	6.18072	6.14	-0.387459	-0.0407229		4.42	5.3	2.07	0.88	-3.23
253	BL-99_low	35.7	45.2	44.5	9.5	-0.7		22.2	27.3	28.4	5.1	1.1		1.60811	1.65568	1.57	0.0475695	-0.0856777					0	0
165	BL-99_low	81	77.5	75.1	-3.5	-2.4		11.2	12.1	10.6	0.9	-1.5		7.23214	6.40496	7.08	-0.827184	0.675041		2.71	2.5	2.45	-0.21	-0.05
255	BL-99_low	96.9	94.7	89.0	-2.2	-5.7		19.5	19.8	18.6	0.3	-1.2		4.96923	4.78283	4.78	-0.186402	-0.00282828		4.12	4.8	2.83	0.68	-1.97
256	BL-99_low	NA	NA	NA	#VALUE!	#VALUE!		NA	NA	NA	#VALUE!	#VALUE!		NA	NA	NA	#VALUE!	#VALUE!		NA	NA	NA	#VALUE!	#VALUE!
257	BL-99_low	127	140	126.2	13	-13.8		34.7	35.1	50.7	0.4	15.6		3.65994	3.9886	2.49	0.328662	-1.4986		12	12.44	22.81	0.44	10.37
258	BL-99_low	NA	NA	NA	#VALUE!	#VALUE!		14.4	9.5	9.2	-4.9	-0.3		0.180556	0.378947	0.57	0.198392	0.191053		2.69	4.7	6.57	2.01	1.87
259	BL-99_low	65.1	52.7	53.1	-12.4	0.4		16.8	16.4	16.1	-0.4	-0.3		3.875	3.21341	3.30	-0.661585	0.0865854		13.4	13.1	4.70	-0.3	-8.4
260	BL-99_low	30.1	31.9	28.7	1.8	-3.2		4.7	6	5.1	1.3	-0.9		6.40426	5.31667	5.63	-1.08759	0.313333		1.65	6.8	0.11	5.15	-6.69
261	BL-99_low	68.2	65.5	70.8	-2.7	5.3		19.1	17.2	19.0	-1.9	1.8		3.57068	3.80814	3.73	0.237459	-0.0781395		8.26	10.5	19.62	2.24	9.12
262	BL-99_low	56.7	72.9	53.6	16.2	-19.3		12.2	14	11.9	1.8	-2.1		4.64754	5.20714	4.50	0.559602	-0.707143		3.69	8.4	2.61	4.71	-5.79
263	BL-99_low	61.3	35.1	53.5	-26.2	18.4		10.8	9.8	10.7	-1	0.9		5.67593	3.58163	5.00	-2.09429	1.41837		5.1	6.56	8.56	1.46	2
264	BL-99_low	137.8	112.78	23.8	-25.02	-88.98		22.5	9.12	4.9	-13.38	-4.22		6.12444	12.3662	4.86	6.24178	-7.50623		3.33	1.1	1.95	-2.23	0.85
265	BL-99_low	42.5	116.2	16.8	73.7	-99.4		5.9	12.48	2.5	6.58	-9.98		7.20339	9.3109	6.72	2.10751	-2.5909		1.43	0.98	2.57	-0.45	1.59
266	BL-99_low	38.5	113.26	10.8	74.76	-102.46		4.5	6.75	1.6	2.25	-5.15		8.55556	16.7793	6.75	8.2237	-10.0293		1.57	2.11	4.44	0.54	2.33
267	BL-99_low	92.9	175.95	32.4	83.05	-143.55		19.2	24.16	7.0	4.96	-17.16		4.83854	7.2827	4.63	2.44416	-2.6527		1.92	1.91	5.30	-0.01	3.39
268	BL-99_low	52	32.4	57.4	-19.6	25		6.1	6.7	8.3	0.6	1.6		8.52459	4.83582	6.92	-3.68877	2.08418		1.87	1.89	1.66	0.02	-0.23
250	BL-99_low	58.9	84.6	51.3	25.7	-33.3		9.2	9.8	8.2	0.6	-1.6		6.40217	8.63265	6.26	2.23048	-2.37265		1.82	7.44	2.59	5.62	-4.85
166	BL-99_low	64.2	71.2	75.2	7	4		16.1	17.2	18.7	1.1	1.5		3.98758	4.13953	4.02	0.151957	-0.119535		5.55	5.11	6.37	-0.44	1.26
355	BL-99_low	34.2	64.4	46.3	30.2	-18.1		3.4	2	5.3	-1.4	3.3		10.0588	32.2	8.74	22.1412	-23.46		6.63	9.27	0.16	2.64	-9.11
358	BL-99_low	34.2	40.1	39.2	5.9	-0.9		4.6	2.1	7.2	-2.5	5.1		7.43478	19.0952	5.44	11.6605	-13.6552		3.65	1.85	3.46	-1.8	1.61
359	BL-99_low	47.5	47.1	29.7	-0.4	-17.4		17.7	8.7	7.4	-9	-1.3		2.68362	5.41379	4.01	2.73018	-1.40379		4.74	9.6	0.52	4.86	-9.08
360	BL-99_low	NA	NA	NA	#VALUE!	#VALUE!		NA	NA	NA	#VALUE!	#VALUE!		NA	NA	NA	#VALUE!	#VALUE!		NA	NA	NA	#VALUE!	#VALUE!
167	BL-99_low	41	75.3	43.1	34.3	-32.2		7.3	7.4	9.1	0.1	1.7		5.61644	10.1757	4.74	4.55924	-5.43568		6.16	9	0.96	2.84	-8.04
361	BL-99_low	27.5	46.1	33.9	18.6	-12.2		4	3.7	4.6	-0.3	0.9		6.875	12.4595	7.37	5.58446	-5.08946		0.1	5.6	0.22	5.5	-5.38
364	BL-99_low	69.5	35.9	70.8	-33.6	34.9		13.3	13.2	17.2	-0.1	4		5.22556	2.7197	4.12	-2.50587	1.4003		4.91	2.58	4.24	-2.33	1.66
192	BL-99_high	NA	NA	NA	#VALUE!	#VALUE!		10	4.4	9.1	-5.6	4.7		NA	NA	NA	#VALUE!	#VALUE!		8.08	10.34	0.64	2.26	-9.7
393	BL-99_high	NA	NA	NA	#VALUE!	#VALUE!		NA	NA	NA	#VALUE!	#VALUE!		NA	NA	NA	#VALUE!	#VALUE!		NA	NA	NA	#VALUE!	#VALUE!
193	BL-99_high	NA	NA	NA	#VALUE!	#VALUE!		5.6	6	6.5	0.4	0.5		NA	NA	NA	#VALUE!	#VALUE!		3.79	6.93	0.43	3.14	-6.5
194	BL-99_high	65.7	77.4	59.4	11.7	-18		23.7	18	13.3	-5.7	-4.7		2.77215	4.3	4.47	1.52785	0.17		4.03	7.3	1.85	3.27	-5.45
195	BL-99_high	57.5	65.2	52.3	7.7	-12.9		8.3	10.1	8.5	1.8	-1.6		6.92771	6.45545	6.15	-0.472265	-0.305446		1.58	12.7	0.14	11.12	-12.56
199	BL-99_high	NA	NA	NA	#VALUE!	#VALUE!		NA	NA	NA	#VALUE!	#VALUE!		NA	NA	NA	#VALUE!	#VALUE!		NA	NA	NA	#VALUE!	#VALUE!
200	BL-99_high	51.3	51.6	50.1	0.3	-1.5		3.5	8.8	8.4	5.3	-0.4		14.6571	5.86364	5.96	-8.79351	0.0963636		5.9	8.7	0.10	2.8	-8.6
201	BL-99_high	NA	NA	NA	#VALUE!	#VALUE!		NA	NA	NA	#VALUE!	#VALUE!		NA	NA	NA	#VALUE!	#VALUE!		NA	NA	NA	#VALUE!	#VALUE!
251	BL-99_high	71.5	57.1	47.0	-14.4	-10.1		20.6	14.5	11.5	-6.1	-3		3.47087	3.93793	4.09	0.467057	0.152069		10.66	12.9	2.47	2.24	-10.43
204	BL-99_high	51.5	57.7	54.5	6.2	-3.2		5.4	6.9	6.9	1.5	0		9.53704	8.36232	7.90	-1.17472	-0.462319		3.87	6.7	4.44	2.83	-2.26
205	BL-99_high	18.4	16.4	16.7	-2	0.3		16.3	15.8	17.2	-0.5	1.4		1.12883	1.03797	0.97	-0.0908597	-0.0679747					0	0
186	BL-99_high	87.2	94.7	92.4	7.5	-2.3		17.6	11.3	18.1	-6.3	6.8		4.95455	8.38053	5.10	3.42599	-3.28053		7.58	7.3	23.35	-0.28	16.05
269	BL-99_high	46.2	57.8	57.1	11.6	-0.7		2	8.3	7.2	6.3	-1.1		23.1	6.96386	7.93	-16.1361	0.966145		2.31	9.7	1.32	7.39	-8.38
271	BL-99_high	76.1	103	92.6	26.9	-10.4		14	16.3	19.9	2.3	3.6		5.43571	6.31902	4.65	0.883304	-1.66902		5.12	9.6	6.58	4.48	-3.02
272	BL-99_high	60.6	72.8	66.6	12.2	-6.2		12	13.2	11.6	1.2	-1.6		5.05	5.51515	5.74	0.465152	0.224848		0.68	13	0.16	12.32	-12.84
273	BL-99_high	87	88.3	86.7	1.3	-1.6		16.2	17.2	16.9	1	-0.3		5.37037	5.13372	5.13	-0.236649	-0.00372093		0.71	15.7	2.84	14.99	-12.86
274	BL-99_high	107.5	156.3	99.9	48.8	-56.4		24.2	7.1	23.0	-17.1	15.9		4.44215	22.0141	4.34	17.5719	-17.6741		2.68	5.3	10.28	2.62	4.98
275	BL-99_high	64.8	64.3	59.0	-0.5	-5.3		6.7	8.7	9.3	2	0.6		9.67164	7.3908	6.34	-2.28084	-1.0508		12.96	13.2	20.87	0.24	7.67
276	BL-99_high	62.9	65.3	63.8	2.4	-1.5		18.7	12.5	11.2	-6.2	-1.3		3.36364	5.224	5.70	1.86036	0.476		6.59	13.1	1.56	6.51	-11.54
277	BL-99_high	47.2	51.1	47.0	3.9	-4.1		5.7	6.3	6.5	0.6	0.2		8.2807	8.11111	7.23	-0.169591	-0.881111		3.58	5.9	2.59	2.32	-3.31
278	BL-99_high	78.7	95.3	85.7	16.6	-9.6		14.7	9.2	17.2	-5.5	8		5.35374	10.3587	4.98	5.00495	-5.3787		12.76	7.6	38.49	-5.16	30.89
279	BL-99_high	35.6	53.7	40.2	18.1	-13.5		5.2	5.5	7.1	0.3	1.6		6.84615	9.76364	5.66	2.91748	-4.10364		2.95	2.16	3.52	-0.79	1.36
280	BL-99_high	109.9	104.4	85.1	-5.5	-19.3		25.3	15.5	12.4	-9.8	-3.1		4.34387	6.73548	6.86	2.39161	0.124516		0.34	13.3	1.81	12.96	-11.49
188	BL-99_high	109.6	107.2	88.5	-2.4	-18.7		16.9	9.8	15.3	-7.1	5.5		6.48521	10.9388	5.78	4.45357	-5.15878		5.51	8.8	1.87	3.29	-6.93
282	BL-99_high	49.1	51.4	50.0	2.3	-1.4		18.8	23.7	21.6	4.9	-2.1		2.6117	2.16878	2.31	-0.442926	0.141224		3.4	8.8	1.41	5.4	-7.39
283	BL-99_high	117.2	104.6	94.3	-12.6	-10.3		31.2	12.3	44.1	-18.9	31.8		3.75641	8.50407	2.14	4.74765	-6.36407					0	0
284	BL-99_high	47.2	52.4	50.3	5.2	-2.1		10.9	12.4	12.3	1.5	-0.1		4.33028	4.22581	4.09	-0.104469	-0.135806		2.15	13.4	6.58	11.25	-6.82
285	BL-99_high	32.2	46.9	40.7	14.7	-6.2		2	9	6.8	7	-2.2		16.1	5.21111	5.99	-10.8889	0.778889		0.9	3.2	6.87	2.3	3.67
286	BL-99_high	98.4	99.7	90.3	1.3	-9.4		22	29	23.9	7	-5.1		4.47273	3.43793	3.78	-1.0348	0.342069		1.32	13.5	2.47	12.18	-11.03
287	BL-99_high	43	65.1	57.9	22.1	-7.2		7.4	6.1	8.1	-1.3	2		5.81081	10.6721	7.15	4.86132	-3.52213		10.33	11.82	2.14	1.49	-9.68
288	BL-99_high	119.7	132.2	97.8	12.5	-34.4		25	19.6	18.7	-5.4	-0.9		4.788	1.64286	5.23	-3.14514	3.58714		5.6	3.22	4.20	-2.38	0.98
189	BL-99_high	61.7	149.36	27.3	87.66	-122.06		9.4	7.19	4.8	-2.21	-2.39		6.56383	20.7733	5.69	14.2095	-15.0833		2.06	11.02	2.94	8.96	-8.08
289	BL-99_high	82.2	115.16	29.1	32.96	-86.06		18.6	8.67	7.3	-9.93	-1.37		4.41935	13.2826	3.99	8.86323	-9.29258		7.45	13.87	8.41	6.42	-5.46
290	BL-99_high	59.4	97.77	35.0	38.37	-62.77		16.7	7.06	3.7	-9.64	-3.36		3.55689	13.8484	9.46	10.2916	-4.38844		1.5	11.7	1.24	10.2	-10.46
291	BL-99_high	61.2	51.02	31.6	-10.18	-19.42		11.8	4.96	7.6	-6.84	2.64		5.18644	10.2863	4.16	5.09985	-6.12629		5.07	12.49	8.73	7.42	-3.76
292	BL-99_high
293	BL-99_high
294	BL-99_high
295	BL-99_high
190	BL-99_high
191	BL-99_high
386	BL-99_high
387	BL-99_high
391	BL-99_high
392	BL-99_high
388	BL-99_high
389	BL-99_high
373	BL-99_high
374	BL-99_high
202	BL-99_high

## Sheet: Figure2
ID	group	V5-Bloating	V5-Epigastric pain	V5-Early satiety	V5-Epigastric burning	V5PDS	V5EPS	V5PDS+EPS	V1PDS-V5PDS	V1PDS-V5PDS＞0.5输出为1	V3PDS-V5PDS	V3PDS-V5PDS＜-0.5输出为1	V1EPS-V5EPS	V1EPS-V5EPS＞0.5输出为1	V3 EPS-V5EPS	V3EPS-V5EPS＜-0.5输出为1	V1PDS+EPS-V5PDS+EPS	V1PDS+EPS-V5PDS+EPS＞0.5输出为1	V3PDS+EPS-V5PDS+EPS	V3PDS+EPS-V5PDS+EPS＜-0.5输出为1		V1Bloating	V2Bloating	V3Bloating	V4Bloating	V1Early satiety	V2Early satiety	V3Early satiety	V4Early satiety	V1Epigastric pain	V2Epigastric pain	V3Epigastric pain	V4Epigastric pain	V1Epigastric burning	V2Epigastric burning	V3Epigastric burning	V4Epigastric burning		V1PDS	V2PDS	V3PDS	V4PDS	group_1	V1PDS-V2PDS	V1PDS-V2PDS＞0.5输出为1	V1PDS-V3PDS	V1PDS-V3PDS＞0.5输出为1	V1PDS-V4PDS	V1PDS-V4PDS＞0.5输出为1
328	Placebo	1	1	1	1	1	1	1	1	1	-1	1	0	0	-1	1	0.5	0	-1	1		2	0	0	0	2	0	0	0	0	0	0	0	2	0	0	0		2	0	0	1	1	2	1	2	1	1	1
329	Placebo	1	1	1	1	1	1	1	0	0	0.5	0	0	0	0.5	0	0	0	0.5	0		2	2	2	0	0	1	1	2	2	0	2	0	0	2	1	0		1	1.5	1.5	1	1	-0.5	0	-0.5	0	0	0
149	Placebo	3	3	2	2	2.5	2.5	2.5	0.5	0	-1.5	1	0.5	0	-1.5	1	0.5	0	-1.5	1		3	2	2	0	3	0	0	0	3	0	2	0	3	0	0	0		3	1	1	0	1	2	1	2	1	3	1
151	Placebo	1	3	1	2	1	2.5	1.75	2	1	-1	1	0.5	0	-2.5	1	1.25	1	-1.75	1		3	0	0	0	3	0	0	0	3	0	0	0	3	0	0	0		3	0	0	1	1	3	1	3	1	2	1
152	Placebo	2	2	3	2	2.5	2	2.25	0.5	0	-2.5	1	1	1	-2	1	0.75	1	-2.25	1		3	0	0	0	3	0	0	0	3	0	0	0	3	0	0	0		3	0	0	1	1	3	1	3	1	2	1
156	Placebo	2	2	1	3	1.5	2.5	2	1.5	1	-1.5	1	0.5	0	-2.5	1	1	1	-2	1		3	0	0	0	3	0	0	0	3	0	0	0	3	0	0	0		3	0	0	1	1	3	1	3	1	2	1
210	Placebo	1	1	1	1	1	1	1	0	0	-0.5	0	0	0	-1	1	0	0	-0.75	1		2	2	1	2	0	0	0	0	2	0	0	0	0	0	0	2		1	1	0.5	1	1	0	0	0.5	0	0	0
211	Placebo	3	3	3	1	3	2	2.5	-1	0	-2	1	-2	0	-2	1	-1.5	0	-2	1		2	2	0	2	2	2	2	2	0	0	0	0	0	0	0	2		2	2	1	2	1	0	0	1	1	0	0
213	Placebo	3	1	3	1	3	1	2	-1	0	-3	1	1	1	-1	1	0	0	-2	1		2	2	0	1	2	2	0	0	2	0	0	1	2	2	0	1		2	2	0	0.5	1	0	0	2	1	1.5	1
214	Placebo	3	3	2	2	2.5	2.5	2.5	-0.5	0	-2.5	1	-2.5	0	-2.5	1	-1.5	0	-2.5	1		2	2	0	0	2	2	0	0	0	0	0	0	0	0	0	0		2	2	0	1	1	0	0	2	1	1	1
140	Placebo	1	3	2	3	1.5	3	2.25	0.5	0	-0.5	0	-3	0	-3	1	-1.25	0	-1.75	1		2	0	2	2	2	0	0	2	0	0	0	0	0	0	0	2		2	0	1	2	1	2	1	1	1	0	0
216	Placebo	2	1	1	1	1.5	1	1.25	-0.5	0	-1.5	1	-1	0	-1	1	-0.75	0	-1.25	1		2	0	0	2	0	0	0	1	0	0	0	0	0	0	0	2		1	0	0	1.5	1	1	1	1	1	-0.5	0
217	Placebo	2	2	2	2	2	2	2	-1	0	-2	1	-2	0	-1.5	1	-1.5	0	-1.75	1		2	2	0	0	0	2	0	0	0	0	0	0	0	0	1	0		1	2	0	1	1	-1	0	1	1	0	0
178	Placebo	1	1	1	1	1	1	1	-0.5	0	-1	1	-0.5	0	-1	1	-0.5	0	-1	1		1	2	0	0	0	0	0	0	0	0	0	0	1	0	0	0		0.5	1	0	0	1	-0.5	0	0.5	0	0.5	0
183	Placebo	3	1	1	1	2	1	1.5	-1	0	-1	1	-1	0	0	0	-1	0	-0.5	0		2	2	2	1	0	0	0	0	0	2	2	1	0	0	0	1		1	1	1	0.5	1	0	0	0	0	0.5	0
220	Placebo	3	3	1	1	2	2	2	0	0	-2	1	-1	0	-2	1	-0.5	0	-2	1		2	0	0	0	2	0	0	0	0	0	0	0	2	1	0	0		2	0	0	1	1	2	1	2	1	1	1
221	Placebo	2	3	3	3	2.5	3	2.75	0	0	-2.5	1	-1.5	0	-2	1	-0.75	0	-2.25	1		2	0	0	0	3	0	0	0	0	0	0	0	3	0	2	0		2.5	0	0	0	1	2.5	1	2.5	1	2.5	1
222	Placebo	1	3	3	1	2	2	2	0	0	-1	1	0.5	0	0	0	0.25	0	-0.5	0		2	1	2	2	2	0	0	0	2	0	2	2	3	2	2	2		2	0.5	1	1	1	1.5	1	1	1	1	1
141	Placebo	2	2	2	2	2	2	2	1	1	-2	1	1	1	-2	1	1	1	-2	1		3	2	0	2	3	2	0	0	3	2	0	0	3	2	0	2		3	2	0	1	1	1	1	3	1	2	1
224	Placebo	3	3	3	3	3	3	3	-2	0	-2	1	-3	0	-3	1	-2.5	0	-2.5	1		2	2	2	0	0	2	0	0	0	0	0	0	0	0	0	0		1	2	1	0	1	-1	0	0	0	1	1
225	Placebo	2	1	1	1	1.5	1	1.25	1.5	1	0.5	0	0.5	0	1	0	1	1	0.75	0		3	2	2	2	3	0	2	2	0	0	2	2	3	2	2	2		3	1	2	2	1	2	1	1	1	1	1
203	Placebo	1	1	1	1	1	1	1	1	1	-1	1	1	1	-1	1	1	1	-1	1		2	2	0	0	2	2	0	0	2	0	0	0	2	2	0	0		2	2	0	1	1	0	0	2	1	1	1
227	Placebo	1	2	2	1	1.5	1.5	1.5	0	0	-1.5	1	-1.5	0	-1.5	1	-0.75	0	-1.5	1		3	0	0	0	0	0	0	0	0	0	0	0	0	0	0	0		1.5	0	0	0	1	1.5	1	1.5	1	1.5	1
228	Placebo	2	2	2	2	2	2	2	-1	0	-1	1	-1	0	-2	1	-1	0	-1.5	1		0	0	0	0	2	0	2	0	0	0	0	0	2	0	0	0		1	0	1	0	1	1	1	0	0	1	1
229	Placebo	2	2	1	2	1.5	2	1.75	1.5	1	-1	1	-1	0	-2	1	0.25	0	-1.5	1		3	0	1	2	3	0	0	0	2	0	0	0	0	1	0	2		3	0	0.5	1	1	3	1	2.5	1	2	1
230	Placebo	3	1	1	2	2	1.5	1.75	0	0	-2	1	0.5	0	-1.5	1	0.25	0	-1.75	1		2	0	0	0	2	0	0	0	2	0	0	0	2	0	0	0		2	0	0	1	1	2	1	2	1	1	1
231	Placebo	1	1	2	1	1.5	1	1.25	1.5	1	0.5	0	1.5	1	-1	1	1.5	1	-0.25	0		3	0	2	0	3	0	2	0	2	0	0	0	3	0	0	0		3	0	2	0	1	3	1	1	1	3	1
232	Placebo	3	3	2	3	2.5	3	2.75	-1.5	0	-1.5	1	-2	0	-3	1	-1.75	0	-2.25	1		0	0	0	0	2	0	2	0	0	0	0	0	2	0	0	0		1	0	1	0	1	1	1	0	0	1	1
233	Placebo	3	3	3	3	3	3	3	-0.5	0	-1	1	-1.5	0	-2	1	-1	0	-1.5	1		2	2	2	2	3	2	2	0	0	2	2	2	3	2	0	2		2.5	2	2	1	1	0.5	0	0.5	0	1.5	1
207	Placebo	2	2	2	2	2	2	2	0	0	-1	1	0	0	-1	1	0	0	-1	1		2	2	0	0	2	0	2	0	2	0	0	0	2	0	2	0		2	1	1	0	1	1	1	1	1	2	1
235	Placebo	2	1	2	2	2	1.5	1.75	1	1	-1	1	0.5	0	-1.5	1	0.75	1	-1.25	1		3	0	2	0	3	0	0	0	2	0	0	0	2	0	0	0		3	0	1	0	1	3	1	2	1	3	1
236	Placebo	1	2	1	3	1	2.5	1.75	1.5	1	-1	1	0.5	0	-2.5	1	1	1	-1.75	1		3	0	0	0	2	0	0	0	3	0	0	0	3	0	0	0		2.5	0	0	0	1	2.5	1	2.5	1	2.5	1
237	Placebo	2	2	1	1	1.5	1.5	1.5	-0.5	0	-1	1	-1.5	0	-1.5	1	-1	0	-1.25	1		1	0	1	0	1	0	0	0	0	0	0	0	0	0	0	0		1	0	0.5	0	1	1	1	0.5	0	1	1
238	Placebo	1	1	1	2	1	1.5	1.25	1	1	-1	1	-1.5	0	-0.5	0	-0.25	0	-0.75	1		2	0	0	0	2	0	0	0	0	0	0	0	0	1	2	0		2	0	0	0	1	2	1	2	1	2	1
239	Placebo	2	2	1	3	1.5	2.5	2	-0.5	0	-0.5	0	-1	0	-1.5	1	-0.75	0	-1	1		0	0	0	0	2	2	2	2	0	0	2	0	3	0	0	0		1	1	1	1	1	0	0	0	0	0	0
240	Placebo	2	2	2	2	2	2	2	-0.5	0	-1	1	0	0	-2	1	-0.25	0	-1.5	1		3	2	0	0	0	0	2	0	2	2	0	2	2	0	0	0		1.5	1	1	0	1	0.5	0	0.5	0	1.5	1
142	Placebo	4	4	4	4	4	4	4	-1	0	-4	1	-1	0	-4	1	-1	0	-4	1		3	2	0	0	3	0	0	0	3	0	0	0	3	0	0	0		3	1	0	0	1	2	1	3	1	3	1
143	Placebo	3	2	3	2	3	2	2.5	-2	0	-3	1	-1	0	-2	1	-1.5	0	-2.5	1		2	1	0	0	0	0	0	0	0	1	0	0	2	0	0	0		1	0.5	0	0	1	0.5	0	1	1	1	1
144	Placebo	3	3	3	1	3	2	2.5	-1.5	0	-3	1	-1.5	0	-2	1	-1.5	0	-2.5	1		1	2	0	0	2	0	0	0	1	0	0	0	0	0	0	0		1.5	1	0	1	1	0.5	0	1.5	1	0.5	0
318	Placebo	2	2	2	2	2	2	2	0	0	-2	1	0	0	-2	1	0	0	-2	1		2	0	0	0	2	0	0	0	2	0	0	0	2	0	0	0		2	0	0	0	1	2	1	2	1	2	1
319	Placebo	3	3	3	3	3	3	3	-1	0	-1	1	-3	0	-3	1	-2	0	-2	1		2	2	2	0	2	0	2	0	0	0	0	0	0	0	0	0		2	1	2	0	1	1	1	0	0	2	1
320	Placebo	3	3	3	3	3	3	3	-1	0	-3	1	-2	0	-3	1	-1.5	0	-3	1		2	2	0	0	2	0	0	0	0	0	0	0	2	0	0	0		2	1	0	0	1	1	1	2	1	2	1
321	Placebo	1	1	3	3	2	2	2	-0.5	0	-2	1	-1	0	-2	1	-0.75	0	-2	1		1	0	0	0	2	0	0	0	0	0	0	0	2	0	0	0		1.5	0	0	0	1	1.5	1	1.5	1	1.5	1
325	Placebo	3	3	3	3	3	3	3	-1	0	-2	1	-3	0	-3	1	-2	0	-2.5	1		2	2	2	2	2	0	0	0	0	0	0	0	0	0	0	2		2	1	1	1	1	1	1	1	1	1	1
326	Placebo	3	3	4	4	3.5	3.5	3.5	-1.5	0	-3.5	1	-3.5	0	-3.5	1	-2.5	0	-3.5	1		2	0	0	0	2	0	0	0	0	0	0	0	0	0	0	0		2	0	0	0	1	2	1	2	1	2	1
172	Positive_control	1	2	2	3	1.5	2.5	2	1.5	1	-0.5	0	0.5	0	-2.5	1	1	1	-1.5	1		3	0	0	0	3	2	2	0	3	0	0	0	3	0	0	0		3	1	1	1	2	2	1	2	1	2	1
150	Positive_control	3	1	3	2	3	1.5	2.25	0	0	-2	1	1.5	1	-0.5	0	0.75	1	-1.25	1		3	0	0	0	3	2	2	0	3	2	0	0	3	2	2	0		3	1	1	0	2	2	1	2	1	3	1
309	Positive_control	3	3	3	3	3	3	3	-1	0	-3	1	-1	0	-3	1	-1	0	-3	1		2	0	0	0	2	2	0	0	2	0	0	0	2	0	0	0		2	1	0	1	2	1	1	2	1	1	1
333	Positive_control	1	1	1	1	1	1	1	1	1	-1	1	-1	0	-1	1	0	0	-1	1		2	0	0	0	2	0	0	0	0	0	0	0	0	0	0	0		2	0	0	1	2	2	1	2	1	1	1
349	Positive_control	4	4	4	4	4	4	4	-2	0	-4	1	-2	0	-4	1	-2	0	-4	1		2	0	0	0	2	2	0	0	2	0	0	0	2	0	0	0		2	1	0	0	2	1	1	2	1	2	1
351	Positive_control	3	3	2	1	2.5	2	2.25	-0.5	0	-1.5	1	-1	0	-2	1	-0.75	0	-1.75	1		2	2	2	0	2	2	0	2	0	0	0	0	2	2	0	0		2	2	1	1	2	0	0	1	1	1	1
296	Positive_control	4	4	4	4	4	4	4	-2	0	-3	1	-1.5	0	-4	1	-1.75	0	-3.5	1		2	2	0	2	2	2	2	0	2	2	0	0	3	2	0	2		2	2	1	1	2	0	0	1	1	1	1
304	Positive_control	3	3	3	3	3	3	3	-1	0	-3	1	-1	0	-3	1	-1	0	-3	1		2	0	0	0	2	0	0	0	2	2	0	0	2	0	0	0		2	0	0	1	2	2	1	2	1	1	1
315	Positive_control	3	2	2	2	2.5	2	2.25	-0.5	0	-1.5	1	0	0	-1	1	-0.25	0	-1.25	1		2	2	0	2	2	2	2	2	2	0	0	0	2	0	2	2		2	2	1	2	2	0	0	1	1	0	0
316	Positive_control	3	3	3	2	3	2.5	2.75	-1	0	-2	1	-0.5	0	-1.5	1	-0.75	0	-1.75	1		2	2	0	2	2	2	2	0	2	0	0	0	2	0	2	2		2	2	1	0	2	0	0	1	1	2	1
184	Positive_control	1	1	3	1	2	1	1.5	1	1	-2	1	2	1	-1	1	1.5	1	-1.5	1		3	2	0	0	3	0	0	0	3	2	0	0	3	0	0	0		3	1	0	1	2	2	1	3	1	2	1
249	Positive_control	3	3	3	3	3	3	3	-1	0	-2	1	-2	0	-2	1	-1.5	0	-2	1		2	2	0	0	2	2	2	0	2	0	0	0	0	2	2	0		2	2	1	0	2	0	0	1	1	2	1
336	Positive_control	1	1	1	1	1	1	1	1	1	1	0	0	0	1	0	0.5	0	1	0		2	2	2	2	2	2	2	2	0	2	2	0	2	2	2	2		2	2	2	2	2	0	0	0	0	0	0
348	Positive_control	2	3	3	2	2.5	2.5	2.5	-0.5	0	-1.5	1	-1.5	0	-2.5	1	-1	0	-2	1		2	0	2	0	2	0	0	2	2	0	0	0	0	0	0	0		2	0	1	0	2	2	1	1	1	2	1
365	Positive_control	3	3	3	1	3	2	2.5	-1	0	-1.5	1	-2	0	-1.5	1	-1.5	0	-1.5	1		2	2	0	0	2	0	3	0	0	0	0	0	0	0	1	0		2	1	1.5	0	2	1	1	0.5	0	2	1
307	Positive_control	1	1	1	1	1	1	1	1	1	0	0	-1	0	-1	1	0	0	-0.5	0		2	2	0	0	2	2	2	0	0	0	0	0	0	0	0	0		2	2	1	0	2	0	0	1	1	2	1
317	Positive_control	2	3	1	2	1.5	2.5	2	-0.5	0	-1.5	1	-1.5	0	-1.5	1	-1	0	-1.5	1		2	0	0	0	0	0	0	0	0	0	0	0	2	2	2	0		1	0	0	0	2	1	1	1	1	1	1
335	Positive_control	3	1	1	1	2	1	1.5	0	0	-2	1	-1	0	0	0	-0.5	0	-1	1		2	0	0	0	2	0	0	0	0	0	0	0	0	0	2	0		2	0	0	0	2	2	1	2	1	2	1
344	Positive_control	2	1	2	1	2	1	1.5	-1	0	0	0	0	0	-1	1	-0.5	0	-0.5	0		2	0	2	0	0	0	2	2	0	0	0	0	2	2	0	0		1	0	2	1	2	1	1	-1	0	0	0
154	Positive_control	2	1	1	1	1.5	1	1.25	1	1	-1.5	1	2	1	-0.5	0	1.5	1	-1	1		3	0	0	0	2	0	0	0	3	0	0	2	3	2	1	0		2.5	0	0	1	2	2.5	1	2.5	1	1.5	1
299	Positive_control	1	1	1	1	1	1	1	1	1	-1	1	1	1	-1	1	1	1	-1	1		2	0	0	0	2	0	0	0	2	0	0	0	2	2	0	0		2	0	0	0	2	2	1	2	1	2	1
302	Positive_control	1	1	1	1	1	1	1	1	1	-1	1	-1	0	-1	1	0	0	-1	1		2	0	0	0	2	0	0	0	0	0	0	0	0	0	0	0		2	0	0	1	2	2	1	2	1	1	1
310	Positive_control	2	2	2	2	2	2	2	0	0	0	0	-2	0	-2	1	-1	0	-1	1		2	2	2	2	2	2	2	2	0	2	0	0	0	2	0	2		2	2	2	2	2	0	0	0	0	0	0
324	Positive_control	2	2	2	2	2	2	2	0	0	0.5	0	0	0	-2	1	0	0	-0.75	1		2	2	3	2	2	2	2	2	2	2	0	2	2	0	0	2		2	2	2.5	2	2	0	0	-0.5	0	0	0
346	Positive_control	4	4	4	4	4	4	4	-2.5	0	-3.5	1	-3	0	-4	1	-2.75	0	-3.75	1		2	0	0	0	1	2	1	0	0	0	0	0	2	0	0	0		1.5	1	0.5	0	2	0.5	0	1	1	1.5	1
136	Positive_control	4	3	3	3	3.5	3	3.25	-1.5	0	-3.5	1	-1	0	-2.5	1	-1.25	0	-3	1		2	2	0	2	2	2	0	2	2	2	0	0	2	2	1	2		2	2	0	2	2	0	0	2	1	0	0
306	Positive_control	1	3	1	1	1	2	1.5	1	1	-1	1	-1	0	-1	1	0	0	-1	1		2	2	0	0	2	2	0	0	0	0	0	0	2	0	2	0		2	2	0	0	2	0	0	2	1	2	1
311	Positive_control	2	3	2	2	2	2.5	2.25	-1	0	-1	1	-1.5	0	-0.5	0	-1.25	0	-0.75	1		0	1	2	2	2	0	0	2	2	1	2	2	0	1	2	2		1	0.5	1	2	2	0.5	0	0	0	-1	0
345	Positive_control	1	1	1	2	1	1.5	1.25	1	1	0	0	-0.5	0	-1.5	1	0.25	0	-0.75	1		2	2	2	2	2	2	0	2	0	0	0	0	2	0	0	2		2	2	1	2	2	0	0	1	1	0	0
350	Positive_control	3	3	3	3	3	3	3	-1	0	-2.5	1	-2	0	-2.5	1	-1.5	0	-2.5	1		2	2	1	2	2	0	0	0	0	2	1	2	2	0	0	2		2	1	0.5	1	2	1	1	1.5	1	1	1
308	Positive_control	1	1	3	1	2	1	1.5	0	0	0	0	1	1	1	0	0.5	0	0.5	0		2	2	2	2	2	0	2	2	2	2	2	2	2	2	2	2		2	1	2	2	2	1	1	0	0	0	0
313	Positive_control	3	1	1	1	2	1	1.5	0	0	-2	1	-1	0	-1	1	-0.5	0	-1.5	1		2	0	0	0	2	0	0	0	0	0	0	0	0	0	0	0		2	0	0	1	2	2	1	2	1	1	1
347	Positive_control	1	1	1	1	1	1	1	1	1	-1	1	1	1	-1	1	1	1	-1	1		2	0	0	0	2	0	0	0	2	0	0	0	2	0	0	0		2	0	0	0	2	2	1	2	1	2	1
300	Positive_control	2	1	3	2	2.5	1.5	2	-0.5	0	-1.5	1	-0.5	0	-0.5	0	-0.5	0	-1	1		2	0	2	0	2	0	0	2	0	0	0	0	2	2	2	0		2	0	1	1	2	2	1	1	1	1	1
215	Positive_control	1	2	1	2	1	2	1.5	1	1	-1	1	-2	0	-2	1	-0.5	0	-1.5	1		2	0	0	0	2	0	0	0	0	0	0	0	0	0	0	0		2	0	0	0	2	2	1	2	1	2	1
301	Positive_control	3	3	3	3	3	3	3	-1	0	-1	1	-3	0	-3	1	-2	0	-2	1		2	2	2	0	2	0	2	0	0	2	0	0	0	2	0	0		2	1	2	0	2	1	1	0	0	2	1
352	Positive_control	1	1	1	1	1	1	1	1	1	-1	1	-1	0	-1	1	0	0	-1	1		2	0	0	0	2	0	0	0	0	0	0	0	0	0	0	0		2	0	0	1	2	2	1	2	1	1	1
298	Positive_control	2	2	2	4	2	3	2.5	0	0	-2	1	-1	0	-3	1	-0.5	0	-2.5	1		2	0	0	0	2	0	0	0	2	0	0	0	2	0	0	0		2	0	0	0	2	2	1	2	1	2	1
137	Positive_control	1	3	2	3	1.5	3	2.25	0.5	0	-1.5	1	-1	0	-3	1	-0.25	0	-2.25	1		2	0	0	0	2	2	0	0	2	0	0	0	2	0	0	0		2	1	0	1	2	1	1	2	1	1	1
303	Positive_control	1	1	1	1	1	1	1	0	0	1	0	1	1	0	0	0.5	0	0.5	0		0	0	2	2	2	0	2	0	2	0	0	0	2	2	2	2		1	0	2	1	2	1	1	-1	0	0	0
148	Positive_control	3	3	3	1	3	2	2.5	0	0	-3	1	1	1	-1	1	0.5	0	-2	1		3	0	0	0	3	0	0	0	3	0	0	0	3	2	2	0		3	0	0	0	2	3	1	3	1	3	1
340	Positive_control	1	1	1	1	1	1	1	1	1	-1	1	0.5	0	0	0	0.75	1	-0.5	0		2	0	0	0	2	0	0	0	0	0	0	0	3	0	2	0		2	0	0	0	2	2	1	2	1	2	1
175	Positive_control	2	1	2	1	2	1	1.5	-0.5	0	-2	1	-1	0	-1	1	-0.75	0	-1.5	1		2	2	0	0	1	2	0	0	0	0	0	0	0	0	0	0		1.5	2	0	0	2	-0.5	0	1.5	1	1.5	1
223	Positive_control	4	4	4	3	4	3.5	3.75	-3	0	-4	1	-2.5	0	-3.5	1	-2.75	0	-3.75	1		2	0	0	0	0	0	0	0	2	0	0	0	0	0	0	0		1	0	0	0	2	1	1	1	1	1	1
357	Positive_control	3	3	3	3	3	3	3	-1	0	-1	1	-1.5	0	-1	1	-1.25	0	-1	1		2	2	2	2	2	2	2	2	1	2	2	2	2	2	2	2		2	2	2	2	2	0	0	0	0	0	0
334	Positive_control	1	1	1	1	1	1	1	1	1	-1	1	-1	0	-1	1	0	0	-1	1		2	0	0	0	2	0	0	0	0	0	0	0	0	0	0	0		2	0	0	1	2	2	1	2	1	1	1
332	Positive_control	2	1	3	1	2.5	1	1.75	-0.5	0	-2.5	1	0	0	-1	1	-0.25	0	-1.75	1		2	2	0	0	2	0	0	0	0	0	0	0	2	2	0	0		2	1	0	0	2	1	1	2	1	2	1
341	Positive_control	3	3	3	3	3	3	3	-1	0	-2	1	-2	0	-3	1	-1.5	0	-2.5	1		2	2	0	0	2	2	2	2	2	2	0	2	0	0	0	0		2	2	1	1	2	0	0	1	1	1	1
362	BL-99_low	1	1	1	1	1	1	1	1	1	-1	1	0	0	-1	1	0.5	0	-1	1		2	2	0	0	2	2	0	0	0	0	0	0	2	0	0	0		2	2	0	0	3	0	0	2	1	2	1
168	BL-99_low	4	4	4	4	4	4	4	-2.5	0	-3	1	-2	0	-4	1	-2.25	0	-3.5	1		2	2	2	0	1	0	0	0	2	2	0	0	2	2	0	0		1.5	1	1	0	3	0.5	0	0.5	0	1.5	1
169	BL-99_low	3	2	3	2	3	2	2.5	-2	0	-3	1	-1	0	-1	1	-1.5	0	-2	1		0	0	0	0	2	0	0	0	0	2	2	2	2	3	0	0		1	0	0	0	3	1	1	1	1	1	1
170	BL-99_low	3	3	3	1	3	2	2.5	0	0	-3	1	1	1	-2	1	0.5	0	-2.5	1		3	0	0	0	3	0	0	0	3	0	0	0	3	0	0	0		3	0	0	0	3	3	1	3	1	3	1
171	BL-99_low	3	1	3	2	3	1.5	2.25	-2	0	-2.5	1	-1.5	0	-1.5	1	-1.75	0	-2	1		2	0	1	0	0	0	0	0	0	2	0	0	0	0	0	0		1	0	0.5	0	3	1	1	0.5	0	1	1
173	BL-99_low	1	1	1	1	1	1	1	1	1	-1	1	0	0	-1	1	0.5	0	-1	1		2	0	0	0	2	0	0	0	0	0	0	0	2	0	0	0		2	0	0	0	3	2	1	2	1	2	1
174	BL-99_low	1	1	3	3	2	2	2	1	1	-2	1	1	1	-2	1	1	1	-2	1		3	0	0	0	3	0	0	0	3	0	0	0	3	0	0	0		3	0	0	0	3	3	1	3	1	3	1
176	BL-99_low	3	3	3	3	3	3	3	-1	0	-2	1	-2.5	0	-3	1	-1.75	0	-2.5	1		2	2	2	2	2	2	0	2	0	0	0	0	1	2	0	2		2	2	1	2	3	0	0	1	1	0	0
177	BL-99_low	3	3	4	4	3.5	3.5	3.5	-0.5	0	-3.5	1	-0.5	0	-3.5	1	-0.5	0	-3.5	1		3	0	0	0	3	0	0	0	3	0	0	0	3	0	0	0		3	0	0	0	3	3	1	3	1	3	1
180	BL-99_low	1	2	2	3	1.5	2.5	2	0.5	0	-0.5	0	-1.5	0	-1.5	1	-0.5	0	-1	1		2	2	2	2	2	0	0	2	0	0	0	0	2	0	2	2		2	1	1	2	3	1	1	1	1	0	0
181	BL-99_low	3	1	3	2	3	1.5	2.25	-0.5	0	-2	1	0.5	0	-0.5	0	0	0	-1.25	1		2	2	2	0	3	2	0	0	2	1	0	0	2	0	2	0		2.5	2	1	0	3	0.5	0	1.5	1	2.5	1
182	BL-99_low	1	1	1	1	1	1	1	2	1	-1	1	2	1	-1	1	2	1	-1	1		3	2	0	0	3	0	0	0	3	0	0	0	3	0	0	0		3	1	0	0	3	2	1	3	1	3	1
163	BL-99_low	4	4	4	4	4	4	4	-1	0	-2.5	1	-1	0	-3.5	1	-1	0	-3	1		3	2	1	2	3	2	2	2	3	2	0	0	3	2	1	2		3	2	1.5	2	3	1	1	1.5	1	1	1
219	BL-99_low	3	3	2	1	2.5	2	2.25	-1.5	0	-2.5	1	-0.5	0	-1	1	-1	0	-1.75	1		1	0	0	0	1	2	0	0	0	2	0	0	3	2	2	0		1	1	0	0	3	0	0	1	1	1	1
241	BL-99_low	4	4	4	4	4	4	4	-3	0	-4	1	-3.5	0	-4	1	-3.25	0	-4	1		2	0	0	0	0	0	0	0	0	0	0	0	1	0	0	0		1	0	0	0	3	1	1	1	1	1	1
242	BL-99_low	3	2	2	2	2.5	2	2.25	-1.5	0	-1.5	1	0	0	-2	1	-0.75	0	-1.75	1		2	0	2	0	0	0	0	0	2	0	0	0	2	0	0	0		1	0	1	0	3	1	1	0	0	1	1
243	BL-99_low	3	3	3	2	3	2.5	2.75	-2	0	-3	1	-2.5	0	-2.5	1	-2.25	0	-2.75	1		0	0	0	0	2	0	0	0	0	0	0	0	0	0	0	0		1	0	0	0	3	1	1	1	1	1	1
245	BL-99_low	1	1	3	1	2	1	1.5	0	0	-1.5	1	-1	0	-1	1	-0.5	0	-1.25	1		2	2	1	0	2	1	0	2	0	0	0	0	0	0	0	0		2	1.5	0.5	1	3	0.5	0	1.5	1	1	1
246	BL-99_low	3	3	3	3	3	3	3	-1	0	-3	1	-2	0	-3	1	-1.5	0	-3	1		2	0	0	0	2	2	0	0	2	0	0	0	0	0	0	0		2	1	0	0	3	1	1	2	1	2	1
247	BL-99_low	1	1	1	1	1	1	1	1	1	-1	1	0	0	-1	1	0.5	0	-1	1		2	0	0	0	2	0	0	0	2	0	0	0	0	0	0	0		2	0	0	0	3	2	1	2	1	2	1
164	BL-99_low	2	3	3	2	2.5	2.5	2.5	-1.5	0	-2.5	1	-0.5	0	-2.5	1	-1	0	-2.5	1		1	0	0	2	1	2	0	0	2	0	0	0	2	2	0	2		1	1	0	1	3	0	0	1	1	0	0
248	BL-99_low	3	3	3	1	3	2	2.5	-1	0	-3	1	0	0	-2	1	-0.5	0	-2.5	1		2	0	0	0	2	0	0	0	2	0	0	0	2	0	0	0		2	0	0	0	3	2	1	2	1	2	1
226	BL-99_low	2	1	3	2	2.5	1.5	2	-1.5	0	-1.5	1	-1.5	0	-1.5	1	-1.5	0	-1.5	1		2	2	0	0	0	2	2	0	0	0	0	0	0	0	0	0		1	2	1	0	3	-1	0	0	0	1	1
234	BL-99_low	3	2	2	1	2.5	1.5	2	-0.5	0	-2.5	1	0.5	0	-1.5	1	0	0	-2	1		2	0	0	0	2	0	0	0	2	0	0	0	2	0	0	0		2	0	0	0	3	2	1	2	1	2	1
252	BL-99_low	2	3	3	3	2.5	3	2.75	-1.5	0	-2.5	1	-2	0	-3	1	-1.75	0	-2.75	1		0	2	0	0	2	2	0	0	0	0	0	0	2	2	0	0		1	2	0	0	3	-1	0	1	1	1	1
253	BL-99_low	3	3	3	1	3	2	2.5	-2	0	-3	1	-1.5	0	-2	1	-1.75	0	-2.5	1		0	0	0	0	2	0	0	0	0	0	0	0	1	2	0	0		1	0	0	0	3	1	1	1	1	1	1
165	BL-99_low	1	1	2	1	1.5	1	1.25	-0.5	0	-1.5	1	0	0	-1	1	-0.25	0	-1.25	1		2	0	0	0	0	0	0	0	2	2	0	0	0	0	0	0		1	0	0	0	3	1	1	1	1	1	1
255	BL-99_low	2	1	1	1	1.5	1	1.25	1	1	0.5	0	0.5	0	0	0	0.75	1	0.25	0		2	2	2	0	3	0	2	0	0	0	0	0	3	2	2	0		2.5	1	2	0	3	1.5	1	0.5	0	2.5	1
256	BL-99_low	4	4	4	4	4	4	4	-1	0	-4	1	-2.5	0	-4	1	-1.75	0	-4	1		3	0	0	0	3	2	0	0	0	0	0	0	3	2	0	0		3	1	0	0	3	2	1	3	1	3	1
257	BL-99_low	1	1	1	1	1	1	1	1	1	-1	1	0	0	-1	1	0.5	0	-1	1		2	0	0	0	2	0	0	0	0	0	0	0	2	0	0	0		2	0	0	0	3	2	1	2	1	2	1
258	BL-99_low	2	3	1	2	1.5	2.5	2	1.5	1	0.5	0	-1.5	0	-2.5	1	0	0	-1	1		3	2	2	2	3	0	2	0	0	0	0	0	2	0	0	2		3	1	2	1	3	2	1	1	1	2	1
259	BL-99_low	1	1	1	1	1	1	1	2	1	-1	1	0.5	0	-1	1	1.25	1	-1	1		3	0	0	0	3	0	0	0	0	0	0	0	3	2	0	0		3	0	0	0	3	3	1	3	1	3	1
260	BL-99_low	2	1	2	1	2	1	1.5	1	1	0	0	1.5	1	-1	1	1.25	1	-0.5	0		3	2	2	0	3	0	2	0	3	0	0	0	2	0	0	0		3	1	2	0	3	2	1	1	1	3	1
261	BL-99_low	2	1	1	1	1.5	1	1.25	-0.5	0	-1.5	1	-1	0	-1	1	-0.75	0	-1.25	1		2	0	0	0	0	0	0	0	0	0	0	0	0	0	0	0		1	0	0	0	3	1	1	1	1	1	1
262	BL-99_low	1	1	1	1	1	1	1	1	1	-1	1	0	0	-1	1	0.5	0	-1	1		2	0	0	0	2	2	0	0	0	0	0	0	2	2	0	0		2	1	0	0	3	1	1	2	1	2	1
263	BL-99_low	4	4	4	4	4	4	4	-2.5	0	-4	1	-4	0	-4	1	-3.25	0	-4	1		0	0	0	0	3	0	0	0	0	0	0	0	0	0	0	0		1.5	0	0	0	3	1.5	1	1.5	1	1.5	1
264	BL-99_low	4	3	3	3	3.5	3	3.25	-1.5	0	-1.5	1	-1	0	-2	1	-1.25	0	-1.75	1		2	2	2	0	2	2	2	0	2	0	0	0	2	2	2	0		2	2	2	0	3	0	0	0	0	2	1
265	BL-99_low	1	1	1	1	1	1	1	2	1	-1	1	0	0	-1	1	1	1	-1	1		3	0	0	0	3	0	0	0	0	0	0	0	2	0	0	0		3	0	0	0	3	3	1	3	1	3	1
266	BL-99_low	2	2	2	2	2	2	2	-1.5	0	-2	1	-1	0	-2	1	-1.25	0	-2	1		0	0	0	0	1	0	0	0	0	0	0	0	2	0	0	0		0.5	0	0	0	3	0.5	0	0.5	0	0.5	0
267	BL-99_low	1	1	3	1	2	1	1.5	1	1	-2	1	0.5	0	-1	1	0.75	1	-1.5	1		3	0	0	0	3	2	0	0	0	0	0	0	3	2	0	0		3	1	0	0	3	2	1	3	1	3	1
268	BL-99_low	3	1	1	1	2	1	1.5	-0.5	0	-1	1	-1	0	-1	1	-0.75	0	-1	1		3	2	2	0	0	0	0	0	0	0	0	0	0	0	0	0		1.5	1	1	0	3	0.5	0	0.5	0	1.5	1
250	BL-99_low	1	1	1	1	1	1	1	0.5	0	-1	1	0	0	-1	1	0.25	0	-1	1		1	0	0	0	2	0	0	0	2	0	0	0	0	0	0	0		1.5	0	0	0	3	1.5	1	1.5	1	1.5	1
166	BL-99_low	2	1	3	2	2.5	1.5	2	0.5	0	-2.5	1	1.5	1	-1.5	1	1	1	-2	1		3	0	0	0	3	0	0	0	3	0	0	0	3	2	0	0		3	0	0	0	3	3	1	3	1	3	1
355	BL-99_low	1	2	1	2	1	2	1.5	1	1	0	0	-1	0	-1	1	0	0	-0.5	0		2	0	2	0	2	2	0	0	2	0	2	2	0	2	0	0		2	1	1	0	3	1	1	1	1	2	1
358	BL-99_low	3	3	3	3	3	3	3	-1	0	-3	1	-1	0	-3	1	-1	0	-3	1		2	2	0	2	2	0	0	2	2	0	0	0	2	0	0	2		2	1	0	2	3	1	1	2	1	0	0
359	BL-99_low	1	1	1	1	1	1	1	1	1	-1	1	-1	0	-1	1	0	0	-1	1		2	2	0	0	2	0	0	0	0	0	0	0	0	0	0	0		2	1	0	0	3	1	1	2	1	2	1
360	BL-99_low	1	1	1	1	1	1	1	1	1	1	0	-1	0	0	0	0	0	0.5	0		2	2	2	0	2	0	2	0	0	2	2	0	0	0	0	0		2	1	2	0	3	1	1	0	0	2	1
192	BL-99_high	1	1	1	1	1	1	1	2	1	-1	1	2	1	-1	1	2	1	-1	1		3	0	0	0	3	0	0	0	3	0	0	0	3	0	0	0		3	0	0	0	4	3	1	3	1	3	1
393	BL-99_high	1	1	1	1	1	1	1	1	1	0	0	1	1	0	0	1	1	0	0		2	0	2	2	2	2	0	2	2	2	0	2	2	0	2	2		2	1	1	2	4	1	1	1	1	0	0
193	BL-99_high	1	1	1	1	1	1	1	1	1	-1	1	0.5	0	-1	1	0.75	1	-1	1		2	2	0	0	2	2	0	2	1	1	0	0	2	0	0	0		2	2	0	1	4	0	0	2	1	1	1
194	BL-99_high	2	3	3	2	2.5	2.5	2.5	0	0	-1.5	1	0	0	-2.5	1	0	0	-2	1		3	2	2	0	2	0	0	0	2	0	0	0	3	0	0	0		2.5	1	1	0	4	1.5	1	1.5	1	2.5	1
195	BL-99_high	3	3	3	1	3	2	2.5	0	0	-3	1	1	1	-1.5	1	0.5	0	-2.25	1		3	2	0	0	3	2	0	0	3	1	0	0	3	0	1	0		3	2	0	0	4	1	1	3	1	3	1
199	BL-99_high	2	1	3	2	2.5	1.5	2	0.5	0	-2.5	1	1.5	1	-1.5	1	1	1	-2	1		3	0	0	0	3	0	0	0	3	0	0	0	3	2	0	0		3	0	0	0	4	3	1	3	1	3	1
200	BL-99_high	3	2	2	1	2.5	1.5	2	0.5	0	-2.5	1	0.5	0	-1.5	1	0.5	0	-2	1		3	0	0	0	3	0	0	0	1	0	0	0	3	0	0	0		3	0	0	0	4	3	1	3	1	3	1
201	BL-99_high	1	1	1	1	1	1	1	2	1	-1	1	2	1	-1	1	2	1	-1	1		3	0	0	0	3	0	0	0	3	0	0	0	3	0	0	0		3	0	0	0	4	3	1	3	1	3	1
251	BL-99_high	2	3	3	3	2.5	3	2.75	-0.5	0	-2.5	1	-1	0	-3	1	-0.75	0	-2.75	1		2	0	0	0	2	0	0	0	2	0	0	0	2	2	0	0		2	0	0	0	4	2	1	2	1	2	1
204	BL-99_high	3	3	3	1	3	2	2.5	-1.5	0	-3	1	-1	0	-2	1	-1.25	0	-2.5	1		2	0	0	0	1	0	0	0	1	0	0	0	1	0	0	0		1.5	0	0	0	4	1.5	1	1.5	1	1.5	1
205	BL-99_high	1	1	2	1	1.5	1	1.25	1.5	1	-1.5	1	2	1	-1	1	1.75	1	-1.25	1		3	2	0	0	3	0	0	0	3	0	0	0	3	0	0	0		3	1	0	0	4	2	1	3	1	3	1
186	BL-99_high	1	1	1	1	1	1	1	2	1	-1	1	2	1	-1	1	2	1	-1	1		3	0	0	0	3	0	0	0	3	0	0	0	3	0	0	0		3	0	0	0	4	3	1	3	1	3	1
269	BL-99_high	2	3	1	2	1.5	2.5	2	-0.5	0	-1.5	1	-2	0	-2.5	1	-1.25	0	-2	1		1	2	0	0	1	0	0	0	1	0	0	0	0	0	0	0		1	1	0	0	4	0	0	1	1	1	1
271	BL-99_high	3	1	1	1	2	1	1.5	-1	0	-2	1	1	1	-1	1	0	0	-1.5	1		2	0	0	0	0	0	0	0	2	0	0	0	2	0	0	0		1	0	0	0	4	1	1	1	1	1	1
272	BL-99_high	2	1	2	1	2	1	1.5	0.5	0	-2	1	-0.5	0	-1	1	0	0	-1.5	1		3	2	0	0	2	0	0	0	0	0	0	0	1	0	0	0		2.5	1	0	0	4	1.5	1	2.5	1	2.5	1
273	BL-99_high	1	1	1	1	1	1	1	1	1	-0.5	0	-1	0	-1	1	0	0	-0.75	1		2	2	1	0	2	2	0	0	0	2	0	0	0	0	0	0		2	2	0.5	0	4	0	0	1.5	1	2	1
274	BL-99_high	1	2	2	3	1.5	2.5	2	0.5	0	-1.5	1	-1.5	0	-1.5	1	-0.5	0	-1.5	1		2	0	0	0	2	2	0	0	2	0	2	0	0	0	0	0		2	1	0	0	4	1	1	2	1	2	1
275	BL-99_high	3	1	3	2	3	1.5	2.25	-2	0	-2	1	0.5	0	-1.5	1	-0.75	0	-1.75	1		2	0	2	0	0	0	0	0	2	0	0	0	2	2	0	0		1	0	1	0	4	1	1	0	0	1	1
276	BL-99_high	1	1	1	1	1	1	1	1	1	-1	1	0	0	-1	1	0.5	0	-1	1		2	2	0	0	2	0	0	0	2	2	0	0	0	0	0	0		2	1	0	0	4	1	1	2	1	2	1
277	BL-99_high	1	1	1	1	1	1	1	0	0	-1	1	-1	0	-1	1	-0.5	0	-1	1		2	0	0	0	0	0	0	0	0	0	0	0	0	0	0	0		1	0	0	0	4	1	1	1	1	1	1
278	BL-99_high	1	1	1	1	1	1	1	1	1	-1	1	-1	0	-1	1	0	0	-1	1		2	1	0	0	2	0	0	0	0	0	0	0	0	0	0	0		2	0.5	0	0	4	1.5	1	2	1	2	1
279	BL-99_high	2	1	3	1	2.5	1	1.75	0.5	0	-2.5	1	0.5	0	-1	1	0.5	0	-1.75	1		3	0	0	0	3	0	0	0	0	0	0	0	3	0	0	0		3	0	0	0	4	3	1	3	1	3	1
280	BL-99_high	3	1	3	3	3	2	2.5	-1.5	0	-2	1	-1	0	-2	1	-1.25	0	-2	1		3	2	2	2	0	2	0	0	0	0	0	0	2	2	0	2		1.5	2	1	1	4	-0.5	0	0.5	0	0.5	0
188	BL-99_high	1	1	1	1	1	1	1	0	0	-1	1	0	0	-1	1	0	0	-1	1		2	0	0	0	0	0	0	0	0	3	0	0	2	0	0	0		1	0	0	0	4	1	1	1	1	1	1
282	BL-99_high	3	1	1	3	2	2	2	0	0	-2	1	-1	0	-2	1	-0.5	0	-2	1		2	0	0	0	2	0	0	0	0	0	0	0	2	0	0	0		2	0	0	0	4	2	1	2	1	2	1
283	BL-99_high	1	1	1	1	1	1	1	1	1	-1	1	0	0	-1	1	0.5	0	-1	1		2	0	0	0	2	0	0	0	0	0	0	0	2	0	0	0		2	0	0	0	4	2	1	2	1	2	1
284	BL-99_high	3	3	2	1	2.5	2	2.25	-1.5	0	-2.5	1	-1	0	-2	1	-1.25	0	-2.25	1		2	0	0	0	0	0	0	0	0	0	0	0	2	0	0	0		1	0	0	0	4	1	1	1	1	1	1
285	BL-99_high	1	1	1	1	1	1	1	1	1	-1	1	0	0	-1	1	0.5	0	-1	1		2	0	0	0	2	0	0	0	0	0	0	0	2	0	0	0		2	0	0	0	4	2	1	2	1	2	1
286	BL-99_high	3	2	2	1	2.5	1.5	2	-0.5	0	-2.5	1	0.5	0	-1.5	1	0	0	-2	1		2	0	0	0	2	0	0	0	2	0	0	0	2	0	0	0		2	0	0	0	4	2	1	2	1	2	1
287	BL-99_high	3	3	1	1	2	2	2	0.5	0	-2	1	0	0	-2	1	0.25	0	-2	1		2	0	0	0	3	0	0	0	2	0	0	0	2	0	0	0		2.5	0	0	0	4	2.5	1	2.5	1	2.5	1
288	BL-99_high	3	1	3	1	3	1	2	0	0	-1	1	1.5	1	1	0	0.75	1	0	0		3	2	2	0	3	2	2	0	2	2	2	0	3	2	2	0		3	2	2	0	4	1	1	1	1	3	1
189	BL-99_high	2	2	2	2	2	2	2	1	1	-1	1	0.5	0	-1	1	0.75	1	-1	1		3	2	1	0	3	2	1	0	2	2	1	0	3	2	1	0		3	2	1	0	4	1	1	2	1	3	1
289	BL-99_high	1	1	1	3	1	2	1.5	2	1	0	0	-0.5	0	-1	1	0.75	1	-0.5	0		3	1	2	2	3	0	0	0	0	0	0	0	3	0	2	2		3	0.5	1	1	4	2.5	1	2	1	2	1
290	BL-99_high	1	1	1	1	1	1	1	0	0	-1	1	0.5	0	0	0	0.25	0	-0.5	0		2	0	0	0	0	0	0	0	0	0	0	0	3	0	2	0		1	0	0	0	4	1	1	1	1	1	1
291	BL-99_high	2	3	3	3	2.5	3	2.75	0.5	0	-2.5	1	-1	0	-2	1	-0.25	0	-2.25	1		3	2	0	0	3	2	0	0	2	2	2	0	2	0	0	0		3	2	0	0	4	1	1	3	1	3	1
292	BL-99_high	1	1	3	1	2	1	1.5	0	0	-1	1	0	0	0	0	0	0	-0.5	0		2	0	2	2	2	0	0	0	2	0	2	2	0	0	0	2		2	0	1	1	4	2	1	1	1	1	1
293	BL-99_high	3	2	2	2	2.5	2	2.25	-0.5	0	-2.5	1	-0.5	0	-2	1	-0.5	0	-2.25	1		2	0	0	0	2	0	0	0	0	0	0	0	3	0	0	0		2	0	0	0	4	2	1	2	1	2	1
294	BL-99_high	2	1	3	1	2.5	1	1.75	0.5	0	-1.5	1	0	0	-1	1	0.25	0	-1.25	1		3	2	0	0	3	0	2	0	0	0	0	0	2	0	0	0		3	1	1	0	4	2	1	2	1	3	1
295	BL-99_high	2	1	1	1	1.5	1	1.25	1	1	-1.5	1	1.5	1	-1	1	1.25	1	-1.25	1		3	0	0	0	2	0	0	0	2	0	0	0	3	0	0	0		2.5	0	0	0	4	2.5	1	2.5	1	2.5	1
190	BL-99_high	1	1	1	1	1	1	1	1	1	-1	1	1.5	1	-1	1	1.25	1	-1	1		2	2	0	0	2	0	0	0	2	0	0	0	3	0	0	0		2	1	0	0	4	1	1	2	1	2	1
191	BL-99_high	1	1	2	1	1.5	1	1.25	-0.5	0	-1.5	1	0	0	-1	1	-0.25	0	-1.25	1		0	0	0	0	2	0	0	0	0	0	0	0	2	0	0	0		1	0	0	0	4	1	1	1	1	1	1
386	BL-99_high	3	3	3	3	3	3	3	-1	0	-3	1	-1	0	-2	1	-1	0	-2.5	1		2	2	0	2	2	0	0	2	2	2	2	0	2	0	0	2		2	1	0	2	4	1	1	2	1	0	0
387	BL-99_high	1	1	1	1	1	1	1	1	1	-1	1	1	1	-1	1	1	1	-1	1		2	0	0	0	2	0	0	0	2	0	0	0	2	0	0	0		2	0	0	0	4	2	1	2	1	2	1
391	BL-99_high	1	1	1	1	1	1	1	1	1	-1	1	1	1	-0.5	0	1	1	-0.75	1		2	0	0	0	2	0	0	0	2	0	0	0	2	0	1	0		2	0	0	0	4	2	1	2	1	2	1
392	BL-99_high	2	2	2	2	2	2	2	-1	0	-1.5	1	-1	0	-2	1	-1	0	-1.75	1		0	0	0	0	2	0	1	0	2	2	0	0	0	0	0	0		1	0	0.5	0	4	1	1	0.5	0	1	1
[truncated: 32 more columns]

## Sheet: Figure3-α diversity
V3_Placebo	V3_Positive_control	V3_BL_99_low	V3_BL_99_high		V3_Placebo	V3_Positive_control	V3_BL_99_low	V3_BL_99_high		V3_Placebo	V3_Positive_control	V3_BL_99_low	V3_BL_99_high
sobs	sobs	sobs	sobs		Shannon	Shannon	Shannon	Shannon		Simpson	Simpson	Simpson	Simpson
1648	1593	666	1161		3.60649	3.30313	1.35358	3.03724		0.041377	0.0685009	0.512239	0.0967906
1418	1388	1442	1055		3.26355	3.06131	3.3174	2.91891		0.088155	0.116229	0.0625249	0.128603
906	1406	1781	1709		3.02588	2.9856	3.23428	3.47499		0.0910151	0.115603	0.0738733	0.0521784
1771	1591	1405	1093		3.83502	3.06871	3.21601	2.9525		0.0388064	0.0943321	0.0758998	0.0994173
1418	966	#N/A	1396		3.34831	2.65312	#N/A	3.62517		0.0573969	0.169414	#N/A	0.0416283
1189	1337	1836	1352		3.1068	3.35776	3.70088	3.43954		0.0835406	0.061858	0.0411665	0.0633778
1338	1070	1445	1439		3.3362	2.71404	3.26129	3.2781		0.06412	0.12566	0.0864284	0.0670631
1559	1528	1339	#N/A		3.06488	3.37702	3.40089	#N/A		0.105702	0.0597766	0.0523497	#N/A
1079	1622	1801	1204		2.78985	3.66657	3.14416	3.51056		0.146183	0.0404941	0.103844	0.0438594
1511	1537	1281	917		3.3946	3.66947	3.41427	2.89434		0.056719	0.0482682	0.0530843	0.0961651
1075	831	1116	1781		2.97453	2.54923	3.33908	3.31348		0.0955782	0.172851	0.0618119	0.0625207
1287	962	1555	1823		2.9632	2.78647	3.27244	3.55714		0.105929	0.124448	0.0836514	0.0508753
1560	1400	896	#N/A		3.20217	3.54194	2.03651	#N/A		0.0867424	0.0487171	0.311873	#N/A
1272	1347	1107	1519		3.49587	3.39671	2.91495	3.41255		0.075934	0.0638378	0.125891	0.0642052
1326	1499	1240	1597		3.4043	2.77881	2.74617	3.51614		0.0550674	0.134669	0.145805	0.0502733
1604	1191	1025	1566		2.91499	2.71577	2.9424	3.12085		0.15954	0.153955	0.100055	0.0819767
1223	1164	1243	1011		2.89887	3.27492	3.21248	2.9954		0.13991	0.0567335	0.0713846	0.0971285
1045	1399	1422	982		2.34637	3.477	3.19639	3.08755		0.254032	0.0513791	0.100433	0.0761946
1320	1429	1038	1653		3.47326	2.81962	3.19324	3.41855		0.0553404	0.150414	0.0680361	0.056997
2011	1292	1247	1250		3.81167	3.29172	3.53487	3.2445		0.0380846	0.0653903	0.0485935	0.0617771
1367	1836	1292	1533		3.42588	3.27851	3.33517	3.23584		0.0594723	0.0948044	0.0730189	0.0992722
1118	1645	1084	1061		3.29187	3.02856	2.0718	3.34823		0.0595768	0.100297	0.359791	0.0764493
1323	1537	1121	1343		2.89589	3.32938	3.44899	2.94198		0.132718	0.06477	0.0503485	0.124806
1622	1213	969	1168		3.29588	3.52971	3.02059	3.09657		0.0830024	0.0519186	0.0778768	0.109446
1179	1454	1389	1944		3.29272	2.88959	3.25262	3.32992		0.0696153	0.135032	0.068229	0.0791849
1380	940	1202	1557		3.02301	3.22253	3.11531	3.45824		0.127836	0.0654468	0.0778213	0.0567878
1322	1420	1523	1410		3.0981	2.96841	3.35164	3.17938		0.090436	0.140592	0.0644851	0.0728792
1971	1594	1094	1762		3.60364	2.89655	3.31424	2.92322		0.0518363	0.151007	0.0698141	0.163258
999	1150	1725	1377		2.90266	2.68766	3.35308	3.19771		0.0941767	0.159455	0.0634128	0.0818848
1816	847	1624	1836		3.38183	1.7737	3.19282	3.21512		0.0666903	0.353561	0.0897375	0.101584
1021	1282	1580	992		2.94405	3.27233	3.03396	3.16295		0.0986838	0.0662437	0.120878	0.0712398
1428	1953	1434	1047		3.31159	3.61354	3.37472	3.01643		0.0657866	0.0505162	0.0541651	0.0992523
1356	974	1734	1167		2.94333	2.54961	3.7609	3.53457		0.118671	0.183912	0.0436599	0.0483806
1207	1045	1257	1369		2.74564	2.92835	3.23615	3.54374		0.18779	0.0969992	0.061947	0.0503752
1448	1475	1047	1192		3.32191	3.3436	3.25912	3.22938		0.0602257	0.064894	0.0676499	0.0673395
1138	1131	1843	1941		2.86679	2.82144	3.32487	3.79938		0.121786	0.142416	0.0678737	0.0432778
1402	975	1061	1252		3.19905	2.25715	3.34969	2.94448		0.117975	0.281727	0.0609117	0.125988
1520	1483	1241	1607		3.18845	3.50682	3.1425	3.52779		0.108589	0.0517864	0.0940899	0.0461138
1459	1435	1337	1188		3.05543	3.04761	3.13248	3.58173		0.117153	0.13358	0.0851423	0.0453611
1071	1430	983	1016		3.3746	3.12772	2.98257	2.7113		0.0568108	0.10468	0.0860098	0.1551
952	987	1277	1153		2.43367	3.08325	3.03213	3.25131		0.216816	0.0980144	0.101922	0.0733544
1355	1015	1677	1324		3.33865	2.2566	3.36532	3.30093		0.0633266	0.243291	0.0747405	0.0774967
1642	1393	1535	1834		2.87918	3.16157	3.04056	3.61669		0.137339	0.0863998	0.112785	0.0483056
1196	1153	950	938		2.52359	3.11922	2.03253	1.98525		0.193029	0.0855498	0.341784	0.34611
1323	1002	1031	1771		2.92432	2.76625	2.54348	3.44886		0.134827	0.141003	0.171442	0.0597288
	1135	1192				2.56845	2.20872				0.21384	0.291713
	1385	1225				3.27782	2.72609				0.0714246	0.155371
	1011					2.2669					0.23535

## Sheet: Figure3-relative abundance
Placebo	Positive_control	BL-99_low	BL-99_high		Placebo	Positive_control	BL-99_low	BL-99_high		Placebo	Positive_control	BL-99_low	BL-99_high		Placebo	Positive_control	BL-99_low	BL-99_high		Placebo	Positive_control	BL-99_low	BL-99_high		Placebo	Positive_control	BL-99_low	BL-99_high		Placebo	Positive_control	BL-99_low	BL-99_high		Placebo	Positive_control	BL-99_low	BL-99_high		Placebo	Positive_control	BL-99_low	BL-99_high		Placebo	Positive_control	BL-99_low	BL-99_high
g__Ruminococcus	g__Ruminococcus	g__Ruminococcus	g__Ruminococcus		g__Roseburia	g__Roseburia	g__Roseburia	g__Roseburia		g__Bifidobacterium	g__Bifidobacterium	g__Bifidobacterium	g__Bifidobacterium		g__Escherichia	g__Escherichia	g__Escherichia	g__Escherichia		g__Alistipes	g__Alistipes	g__Alistipes	g__Alistipes		g__Eubacterium	g__Eubacterium	g__Eubacterium	g__Eubacterium		g__Lactobacillus	g__Lactobacillus	g__Lactobacillus	g__Lactobacillus		s__Escherichia_coli	s__Escherichia_coli	s__Escherichia_coli	s__Escherichia_coli		s__[Eubacterium]_rectale	s__[Eubacterium]_rectale	s__[Eubacterium]_rectale	s__[Eubacterium]_rectale		s__Ruminococcaceae_bacterium	s__Ruminococcaceae_bacterium	s__Ruminococcaceae_bacterium	s__Ruminococcaceae_bacterium
0.111926	0.0404253	0.115971	0.0465705		0.027312	0.033721	0.0227872	0.0214381		0.0670899	0.000800791	0.000666295	0.0827285		0.000894147	0.00113645	0.0182543	0.00180204		0.0139154	0.00875114	0.00200084	0.0328385		0.0501461	0.0296397	0.0279284	0.0280311		0.000420646	0.000277617	0.000290927	0.0887148		0.000878378	0.00113598	0.0176749	0.00175252		0.00182184	0.00359015	0.0194821	0.0163029		0.0149808	0.025227	0.0142369	0.0205797
0.0376955	0.00950343	0.0379879	0.0596779		0.0248124	0.0386209	0.0537437	0.0211236		0.000691729	0.013217	0.00328889	0.0116107		0.0118877	0.00268549	0.00313997	0.0117512		0.0186931	0.0632908	0.0178289	0.0219101		0.0149635	0.00564716	0.0190423	0.0163887		0.000281375	0.000278976	0.000388376	0.00335647		0.011555	0.00262973	0.0030718	0.0114352		0.00145094	0.00115339	0.00358282	0.00571157		0.00406661	0.00196423	0.0245819	0.0177494
0.0303173	0.0469964	0.0500088	0.0329154		0.0500644	0.0182146	0.0922851	0.0713888		0.0311752	0.00847824	0.00745654	0.034237		0.0044844	0.00123906	0.00353358	0.00606164		0.007642	0.116212	0.012934	0.00903709		0.0302789	0.0139751	0.00847446	0.016614		0.000522767	0.000354226	0.000498041	0.00621987		0.00431809	0.00122726	0.00342394	0.00589881		0.0195942	0.0243691	0.0119706	0.00615887		0.0194295	0.0237842	0.0214531	0.00990755
0.0517656	0.017892	0.0752074	0.0484156		0.0541511	0.0696124	0.0227363	0.0333124		0.00640124	0.00210096	0.0105176	0.100533		0.00163362	0.0536793	0.00624085	0.00164214		0.0251279	0.00798735	0.046487	0.0132103		0.0101129	0.0215401	0.0334113	0.021013		0.000454117	0.000369834	0.00601987	0.0015721		0.00159379	0.0522237	0.00605515	0.00160626		0.0223081	0.00612784	0.0046598	0.0561445		0.013233	0.0107538	0.0606901	0.0428961
0.0198601	0.00663696	0.0347392	0.0270631		0.0649311	0.0168996	0.157646	0.0320963		0.00140632	0.0346442	0.00461959	0.0775208		0.00110749	0.00231783	0.00284353	0.000535226		0.0078379	0.000998866	0.00291909	0.000367625		0.0312334	0.00332148	0.0192743	0.0770723		0.000401655	0.000256677	0.000580782	0.000865581		0.00110361	0.00231467	0.00278672	0.000526377		0.0467807	0.000765947	0.0399907	0.168142		0.0113866	0.000638363	0.00404972	0.0169569
0.0635034	0.0250411	0.0240505	0.0177107		0.0338505	0.00885887	0.0303274	0.0316083		0.0188377	0.0119405	0.00415981	0.00379856		0.00840438	0.271175	0.000830074	0.00571212		0.00835721	0.000957613	0.0644999	0.0826468		0.0503792	0.00607011	0.0455868	0.018236		0.000386708	0.000308249	0.000822026	0.000484092		0.00818118	0.260574	0.000818607	0.00558662		0.00884241	0.00115364	0.00169019	0.00579727		0.0136791	0.000986533	0.0569273	0.0155835
0.0258331	0.0601949	0.0224958	0.0576706		0.0353108	0.0318377	0.0253493	0.010937		0.0110665	0.00336691	0.0110575	0.026544		0.00206132	0.000918557	0.00400819	0.244139		0.0285483	0.00105693	0.00157968	0.000375291		0.00870674	0.0225051	0.00407527	0.00768124		0.000381047	0.000331654	0.000916979	0.000355553		0.00204498	0.000909824	0.00393488	0.236832		0.0113834	0.00273915	0.000710046	0.00109568		0.00805139	0.00409225	0.00550504	0.00676382
0.0386792	0.0154165	0.0409745	0.0299157		0.0311381	0.00705312	0.0120906	0.11457		0.0041129	0.036113	0.0458121	0.00593811		0.00292703	0.0023142	0.0158476	0.000647859		0.0162529	0.0948205	0.119058	0.0199647		0.0205732	0.0164066	0.0167664	0.0696747		0.00344112	0.000267412	0.000615331	0.000560038		0.00283278	0.00227519	0.0152601	0.000637566		0.0171226	0.00687499	0.0169661	0.00388982		0.024577	0.021533	0.024365	0.048706
0.0562256	0.0442975	0.0909032	0.027299		0.126256	0.0450759	0.0492541	0.0418791		0.00538186	0.00581009	0.0748705	0.0237053		0.00189477	0.00158821	0.00184015	0.0011215		0.0308917	0.0311172	0.00504499	0.106486		0.0209478	0.0150728	0.0225871	0.0280908		0.000731295	0.000281998	0.000705511	0.0104558		0.0018376	0.00157603	0.00180152	0.00110511		0.0213861	0.00426785	0.0171364	0.00985653		0.0108964	0.00489429	0.00265499	0.0372155
0.0213392	0.0175477	0.00464591	0.0293941		0.0571781	0.0241559	0.0056431	0.0436213		0.024329	0.007624	0.00146978	0.116093		0.00127977	0.00184993	0.0781514	0.0012355		0.0123065	0.052209	0.000756677	0.000526754		0.0138496	0.0126389	0.000829662	0.0245848		0.000717549	0.000475192	0.00016316	0.0111382		0.00125768	0.00183904	0.0759856	0.00122432		0.044733	0.0102581	0.000580635	0.115623		0.00515031	0.00777308	0.000334286	0.00754314
0.0294576	0.108765	0.0357369	0.0194352		0.0326402	0.00836088	0.00842042	0.140105		0.0062804	0.0108405	0.132439	0.00383744		0.00159151	0.155758	0.0014617	0.00155108		0.0450374	0.000304451	0.0627357	0.0236352		0.0108486	0.00633979	0.0127829	0.0130546		0.00998591	0.000243929	0.000373552	0.000554475		0.00156851	0.148387	0.00142717	0.00152385		0.018889	0.00181568	0.00662732	0.00587385		0.0107747	0.00183649	0.0130413	0.0182172
0.0536967	0.0503538	0.0725381	0.000897047		0.129405	0.0312707	0.0848399	0.000341867		0.01001	0.0135	0.0365647	0.34021		0.0409413	0.0173653	0.00333895	0.0105619		0.0096294	0.0344076	0.0246151	0.00029633		0.0223305	0.0214175	0.0580544	0.000363258		0.000709106	0.000610748	0.00331425	0.45399		0.0398573	0.0169124	0.00325217	0.0102802		0.0677647	0.0745112	0.00388124	0.000138733		0.0172769	0.0291572	0.0362355	0.000123041
0.033687	0.0147585	0.0368573	0.0778905		0.00410441	0.0141626	0.00679134	0.0598303		0.0753755	0.0105459	0.0530206	0.00232961		0.00597134	0.00579195	0.266068	0.000967564		0.000875941	0.0884686	0.000460167	0.0245718		0.0364261	0.00630357	0.00508497	0.0122612		0.000357278	0.000363327	0.000234959	0.00078321		0.00581362	0.00566224	0.25863	0.000964338		0.012388	0.00370141	0.00248408	0.0423672		0.00258615	0.0157448	0.0011263	0.00597492
0.0347184	0.00201923	0.0282927	0.041553		0.00172574	0.000731768	0.00799971	0.0404448		0.0192763	0.00318769	0.00130904	0.00689952		0.0428578	0.00943147	0.00222532	0.00083377		0.000952242	0.038861	0.14586	0.0301562		0.00612404	0.000969474	0.00384241	0.016395		0.002507	0.000162271	0.000495716	0.000880238		0.0414825	0.00926786	0.00218862	0.000825471		0.000543968	0.00513976	0.000892951	0.00502848		0.0497827	0.000376285	0.0153676	0.0202694
0.0285624	0.0509895	0.116448	0.0341889		0.0902122	0.0155778	0.00582518	0.163967		0.00809517	0.000593804	0.00835854	0.00553018		0.000684691	0.135185	0.149169	0.000986101		0.0264374	0.0873691	0.00189539	0.0173303		0.0235827	0.0168157	0.00754868	0.0468872		0.000445944	0.00112609	0.000323635	0.00106851		0.000683079	0.131316	0.142123	0.00096854		0.00552975	0.00169528	0.00257693	0.00943033		0.0132682	0.0225888	0.00234861	0.0234933
0.0256164	0.0505863	0.0181548	0.055848		0.0252101	0.0289078	0.0127807	0.0113811		0.0187003	0.0140976	0.00178423	0.0235055		0.000509377	0.00162214	0.00176563	0.0213918		0.00676827	0.011424	0.0564791	0.00111812		0.0423611	0.0128015	0.0135515	0.0199301		0.000570292	0.00171856	0.00070542	0.000351833		0.000504448	0.00154385	0.00175808	0.0208236		0.12141	0.00505261	0.00333195	0.00816215		0.0224342	0.0149634	0.00682197	0.00290033
0.0214526	0.0338351	0.138802	0.110122		0.0135406	0.0354721	0.0126253	0.0791282		0.0303936	0.00565377	0.010062	0.0148245		0.00127607	0.00293456	0.00148542	0.241544		0.052188	0.00186764	0.000403451	0.000399147		0.0134407	0.0292109	0.0266641	0.00536598		0.00113671	0.0010228	0.000579429	0.000278461		0.0012606	0.00284454	0.00144413	0.230389		0.0120736	0.110136	0.019035	0.00314971		0.01303	0.0086148	0.0239423	0.00269507
0.0297959	0.0212357	0.0114315	0.0570089		0.0583636	0.0168158	0.125479	0.0619424		0.00464718	0.0336298	0.00534384	0.0273286		0.000505405	0.0230454	0.00884347	0.0380304		0.00419268	0.00553442	0.00907159	0.0120658		0.0194358	0.00787467	0.00358166	0.0139857		0.000575974	0.00252563	0.0281994	0.000409865		0.000493802	0.022397	0.00852431	0.0370031		0.0961339	0.0163397	0.00333289	0.00681073		0.0155899	0.0012241	0.000629591	0.00637049
0.0314429	0.0100314	0.0187573	0.0646767		0.105826	0.00578403	0.0710982	0.0840736		0.00416299	0.00946753	0.00303854	0.0276593		0.000537003	0.035529	0.000424433	0.00126331		0.00759995	0.0200605	0.0315847	0.00303833		0.0541937	0.0128596	0.037114	0.0242865		0.000978187	0.000263131	0.00177024	0.000969672		0.000532343	0.0343653	0.000419422	0.00125492		0.0344727	0.0199906	0.00396721	0.0635269		0.0151588	0.00226071	0.0287866	0.00272626
0.0243373	0.0283732	0.043551	0.017889		0.0320577	0.0132853	0.12744	0.0816377		0.00199704	0.00509452	0.00163579	0.0191226		0.000651017	0.0012949	0.001117	0.00364133		0.0364809	0.0390246	0.00881517	0.00192417		0.0156146	0.0149561	0.0239955	0.043451		0.00097982	0.000902477	0.000668477	0.000828234		0.000644175	0.00128061	0.00108548	0.00356575		0.0126759	0.0165175	0.022966	0.0584982		0.0039919	0.0121908	0.0211724	0.0249362
0.0257735	0.0277003	0.0167744	0.155641		0.0155837	0.0621682	0.0184762	0.0357831		0.000650726	0.00750629	0.00505741	0.00555858		0.000485397	0.00436494	0.00194128	0.0153812		0.0464785	0.0623433	0.0425187	0.000315815		0.01091	0.00947724	0.0197839	0.0201349		0.000589727	0.000372165	0.000553016	0.000485856		0.00048351	0.00423373	0.00190718	0.0149515		0.00642621	0.00837334	0.0300539	0.0557311		0.0185023	0.0168558	0.0123748	0.00201022
0.0659003	0.0135093	0.0513922	0.0185075		0.213998	0.0086818	0.0435396	0.0257948		0.0959082	0.0329616	0.00261514	0.0114961		0.106577	0.00204931	0.00191217	0.0030089		0.000172688	0.0806902	0.0982879	0.0575336		0.00382989	0.0163092	0.0106945	0.0075659		0.00818285	0.000254967	0.00050229	0.000268011		0.10349	0.00201874	0.00188473	0.0029153		0.0072051	0.00657184	0.017321	0.00206138		0.0014666	0.0209531	0.0154723	0.00483983
0.0609408	0.0177709	0.024915	0.033862		0.0791857	0.0441422	0.0374326	0.0128949		0.00851929	0.000670349	0.00425985	0.0152899		0.00125577	0.00207793	0.00074653	0.00459734		0.0363177	0.0179187	0.0571941	0.0580648		0.0244342	0.00722713	0.0557414	0.00880918		0.00136574	0.000264969	0.000897678	0.000521273		0.00123567	0.00202128	0.000740548	0.00444205		0.0394881	0.00190571	0.0131223	0.0110246		0.0137351	0.00188047	0.0271372	0.0237782
0.0335181	0.0196692	0.0272433	0.0514774		0.0325795	0.00866958	0.0256923	0.0444179		0.00723811	0.000697685	0.00785548	0.0231417		0.524518	0.0609023	0.00161429	0.00449417		0.000305909	0.0208834	0.0734803	0.0132458		0.00368922	0.0235371	0.0130039	0.0654111		0.00293	0.00099399	0.000811846	0.000434648		0.510035	0.0590664	0.00158925	0.00437474		0.0213591	0.022249	0.00234887	0.0458044		0.00079163	0.0149768	0.0142178	0.022923
0.0271294	0.037537	0.0794175	0.0162567		0.0484909	0.0273607	0.00443163	0.0102176		0.0520032	0.0194513	0.14797	0.00132011		0.100051	0.00243886	0.00206356	0.00232634		0.00026371	0.220595	0.00141966	0.0812856		0.0130846	0.0112655	0.0370206	0.0209687		0.0026033	0.000751472	0.00793622	0.000477532		0.0961671	0.00240398	0.00205669	0.00226353		0.0020427	0.00127089	0.00152785	0.00155309		0.00102795	0.00493138	0.0240606	0.0263764
0.0283156	0.0218039	0.107166	0.00872485		0.0434844	0.0708191	0.0328869	0.00331879		0.00159144	0.00132981	0.0202875	0.00357971		0.000898599	0.000700607	0.00107293	0.0011482		0.0391644	0.0554586	0.0321356	0.024706		0.0202511	0.0298887	0.0117004	0.00351481		0.00291203	0.00412405	0.00190899	0.000311456		0.000873706	0.00069255	0.00105772	0.00114303		0.0190761	0.00739633	0.0222042	0.0268038		0.0144281	0.0204726	0.0588551	0.000592216
0.0161668	0.0268963	0.0654114	0.104049		0.0875376	0.0418649	0.0105963	0.00802047		0.00169816	0.00129875	0.00402549	0.112221		0.002135	0.00245137	0.0615715	0.126944		0.00751718	0.0140004	0.00460515	0.000305806		0.0296	0.108892	0.0171952	0.0163825		0.0009064	0.000564243	0.00420946	0.000301261		0.00210701	0.00239155	0.0597221	0.12178		0.013831	0.0283572	0.0216777	0.00221464		0.0137141	0.103029	0.0114012	0.00542955
0.0249038	0.0379896	0.0790301	0.0421575		0.00827749	0.0761401	0.082568	0.0171559		0.0163378	0.0179843	0.00198307	0.00953166		0.0825048	0.00195278	0.00122765	0.00218032		0.006938	0.0542691	0.0184181	0.028734		0.0075046	0.0358677	0.0194784	0.0237957		0.000267411	0.00203257	0.000586444	0.0019181		0.0800721	0.00190967	0.00120925	0.00212073		0.00999513	0.0301062	0.035494	0.00539122		0.00617439	0.0266726	0.00896561	0.0243583
0.0386558	0.0179714	0.105644	0.0825503		0.0365902	0.00975828	0.0415752	0.0328569		0.00704964	0.00170779	0.034405	0.00880539		0.000984966	0.0108343	0.0253067	0.00315185		0.0523198	0.000133385	0.0019981	0.00293935		0.0383938	0.0169745	0.0516751	0.0190652		0.000543996	0.000166468	0.00119752	0.000881575		0.000977568	0.0107234	0.0246353	0.00302836		0.0293015	0.00564391	0.0221344	0.0225239		0.0360608	0.00302698	0.0634095	0.00932844
0.00988334	0.0285325	0.0122321	0.0182517		0.0234515	0.00880444	0.0220828	0.0448689		0.0236752	0.00556113	0.000885261	0.00964931		0.0176729	0.000830735	0.00143619	0.00158063		0.00191197	0.0924716	0.0404708	0.0298625		0.00243886	0.0498674	0.0486112	0.0157526		0.00223198	0.000533583	0.00029238	0.0108636		0.0171462	0.000826021	0.00143292	0.00156011		0.00104972	0.0146252	0.00914512	0.0026663		0.0146932	0.019284	0.00780579	0.0253953
0.0283862	0.0241694	0.037684	0.0261732		0.0157476	0.00796818	0.160011	0.166667		0.00930869	0.00244534	0.00230282	0.011263		0.00152922	0.00181541	0.0013229	0.000873042		0.0471312	0.0049925	0.0321224	0.000588647		0.0240996	0.00551949	0.0257229	0.0171215		0.00197634	0.00057849	0.000494956	0.000379035		0.00151402	0.00176757	0.00129113	0.000863954		0.0684475	0.00184999	0.0101728	0.023051		0.0149628	0.0230726	0.0288337	0.016238
0.0403986	0.00655536	0.0219689	0.049142		0.0379195	0.0162398	0.0286018	0.0205619		0.0568304	0.00476783	0.00992842	0.0112061		0.00125107	0.0131201	0.00116682	0.000360778		0.0350204	0.0124846	0.00777413	0.0143708		0.0122471	0.00268601	0.0339492	0.0130489		0.000913835	0.000175451	0.00039977	0.00050517		0.00123684	0.0127009	0.00116336	0.000354277		0.036612	0.00649466	0.0681527	0.00444282		0.00502987	0.0019408	0.0118165	0.0279669
0.0298311	0.048647	0.141672	0.0277585		0.0577814	0.00953539	0.0181709	0.0153666		0.00424424	0.00124228	0.0175431	0.0450682		0.00112009	0.00130814	0.00618055	0.00153362		0.0259273	0.00683646	0.00520424	0.000864394		0.0234665	0.0218388	0.0144295	0.0080593		0.000333755	0.000374769	0.000889857	0.000345466		0.00110437	0.00129477	0.00594507	0.00152594		0.00961555	0.0562166	0.0261765	0.00210722		0.046706	0.00169679	0.0286031	0.0112297
0.0161378	0.0199725	0.0822956	0.031786		0.00373581	0.022092	0.0277604	0.0677588		0.0134899	0.0136503	0.0306296	0.00976894		0.00394003	0.00715647	0.000862192	0.00846959		0.0758192	0.085639	0.00115243	0.0372404		0.00412484	0.00771432	0.0409092	0.0713032		0.000299421	0.000362907	0.00165069	0.000629498		0.00387473	0.00699015	0.000849023	0.00824666		0.00220241	0.00463511	0.0678523	0.0076195		0.0065656	0.0134456	0.00340032	0.106152
0.216944	0.0070497	0.0498615	0.0356577		0.00595288	0.0108772	0.0405892	0.148193		0.0343872	0.0202514	0.0801827	0.0196683		0.0373742	0.00287344	0.00543594	0.00378147		0.00233021	0.0729956	0.000727059	0.0299626		0.00407758	0.0348351	0.00965651	0.0446637		0.000470381	0.000259459	0.000332472	0.00216094		0.0362495	0.00281994	0.00530367	0.00369723		0.00282706	0.000717417	0.00178684	0.023144		0.00399717	0.0239715	0.00254376	0.0313506
0.032264	0.0245546	0.045353	0.0546614		0.0474487	0.0209761	0.00443862	0.0177884		0.00506781	0.0105224	0.124556	0.0560465		0.00115716	0.00100053	0.00171996	0.0010955		0.0308951	0.0625038	0.000274734	0.0791687		0.0323131	0.0172141	0.0451927	0.0336362		0.000470533	0.000465724	0.006421	0.000626251		0.00114878	0.000992613	0.00167799	0.00108476		0.0611531	0.0158543	0.0207756	0.0621769		0.028551	0.0116478	0.00181155	0.0253478
0.0213853	0.0570474	0.0495908	0.0218438		0.0442257	0.0431186	0.138365	0.0623482		0.00629704	0.0158574	0.0459895	0.00157142		0.00287	0.0066765	0.000905507	0.00096101		0.0924715	0.0427406	0.0379534	0.0303559		0.0244723	0.0233379	0.0285377	0.0344984		0.00041063	0.00059829	0.00540381	0.00103327		0.00284797	0.00638333	0.000885902	0.000955902		0.010265	0.00254689	0.0079419	0.033657		0.00892942	0.0253259	0.019833	0.0130322
0.0475	0.0172295	0.000386055	0.0228933		0.0446887	0.0396262	0.000164431	0.0848587		0.156681	0.0232929	0.00682316	0.0119294		0.000982403	0.00420106	0.731226	0.018974		0.00150911	0.0991961	0.000300061	0.000713355		0.00741242	0.00950226	0.000139604	0.0145017		0.000814985	0.000486291	0.000241519	0.00014804		0.000975181	0.00406878	0.709039	0.0184814		0.00182535	0.0131626	5.90966e-05	0.0195621		0.00395425	0.0260457	9.13241e-05	0.00193949
0.0510266	0.0136066	0.0157693	0.0755384		0.0499956	0.0639791	0.0257406	0.0406642		0.063747	0.00532287	0.00211294	0.00714196		0.00337153	0.00130338	0.000545675	0.0013066		0.000587476	0.00432611	0.0293653	0.0106464		0.0206526	0.013423	0.00625094	0.00842169		0.00151741	0.000307822	0.000567984	0.000472001		0.00326424	0.00129143	0.000541033	0.00128354		0.0252884	0.00236601	0.00975995	0.0201887		0.0357412	0.014017	0.00699943	0.0532281
0.0597278	0.029175	0.0508038	0.0435521		0.0545051	0.0289105	0.0157108	0.207808		0.0922212	0.0504284	0.00952371	0.0278309		0.00106633	0.00993545	0.032903	0.0223517		0.00972409	0.0280636	0.01359	0.00694518		0.0220181	0.0269374	0.013958	0.0358113		0.0504272	0.00191008	0.00512625	0.000887536		0.00104205	0.00965255	0.0318985	0.0123349		0.0345494	0.0486624	0.0306951	0.00682258		0.0782399	0.00768499	0.00436408	0.0442498
0.0426972	0.00537422	0.0303269	0.018163		0.130642	0.000754634	0.0123058	0.00457372		0.00531317	0.345117	0.00943979	0.0146929		0.000778247	0.162844	0.121181	0.00242118		0.0135315	0.000543015	0.00952365	0.00350198		0.0308806	0.00922155	0.0154258	0.0526583		0.00928844	0.000597431	0.000374689	0.000462124		0.00075647	0.158059	0.117769	0.00239834		0.0312178	0.000343074	0.0343282	0.00157964		0.0146892	0.000244457	0.038755	0.00103934
0.0237551	0.0420789	0.077844	0.0161339		0.0264131	0.232475	0.0726666	0.0471452		0.00180205	0.00939121	0.0536559	0.029687		0.285595	0.000619266	0.0147352	0.00133607		0.0571604	0.01366	0.00112554	0.0324069		0.0198924	0.024814	0.0287649	0.0156286		0.000374386	0.000621476	0.000708958	0.0109426		0.276025	0.000611005	0.0142329	0.00133008		0.0171028	0.00677924	0.015978	0.00453811		0.0132671	0.0156466	0.0150475	0.00663247
0.0222201	0.0426309	0.0230854	0.0292924		0.0184034	0.01823	0.0275566	0.00623679		0.00620168	0.0152825	0.00764826	0.0258334		0.00140944	0.000670561	0.000826631	0.00221226		0.0692148	0.097245	0.0178021	0.00453618		0.0137831	0.0163509	0.0284226	0.0692207		0.00032041	0.000437549	0.00950504	0.000583456		0.00139856	0.00066668	0.000814304	0.00218197		0.0228114	0.0316799	0.0384405	0.00261783		0.0202514	0.00716655	0.0189996	0.00170495
0.0312096	0.0222493	0.00669043	0.0255878		0.00970161	0.0518343	0.0161686	0.0491445		0.0464456	0.00504931	0.00592129	0.0107661		0.00115053	0.0363002	0.0234395	0.000834343		0.0657893	0.0762827	0.00122331	0.0355872		0.0305317	0.00857115	0.0143559	0.0553549		0.013559	0.000643491	0.000926065	0.000977917		0.0011236	0.0350243	0.0228145	0.000827118		0.00635232	0.00507615	0.00102293	0.0700431		0.0416972	0.0105383	0.00049139	0.0526825
	0.0374882	0.0617316	0.0256			0.0246834	0.0639433	0.0298485			0.0164618	0.030419	0.0072954			0.000686876	0.000989111	0.0113343			0.0016069	0.0222889	0.0846746			0.0313963	0.00961665	0.0137327			0.00243624	0.000454744	0.000425349			0.000662299	0.000975387	0.0109617			0.0142146	0.00257962	0.0180304			0.0325134	0.0386744	0.0205605
	0.0225382	0.0406201	0.0308917			0.0120759	0.00381412	0.10583			0.00681927	0.0531543	0.00455612			0.00189368	0.0010898	0.0344935			0.110027	0.0306883	0.0423662			0.00959108	0.0161952	0.0608576			0.000410705	0.00815305	0.000664962			0.00188559	0.00108185	0.0335918			0.0172398	0.0270275	0.0081881			0.00615956	0.010985	0.0238155
	0.00899591	0.0214724				0.00237674	0.0518023				0.0108065	0.00645379				0.00649394	0.000918041				0.00160278	0.036082				0.00577262	0.0333351				0.000214616	0.000388238				0.00546149	0.000915336				0.00284648	0.0318357				0.00117836	0.0109749
	0.0364332					0.0143687					0.0757522					0.00374871					0.0683557					0.00377396					0.00543252					0.00361158					0.00117414					0.0485237
s__Bifidobacterium_animalis	Post treatment
Placebo	0.000159467	2.20803e-05	0.000408137	4.0427e-05	1.3427e-05	6.23238e-05	0.000281574	2.87029e-05	2.77473e-05	5.80478e-05	2.46519e-05	2.55986e-05	0.000161967	5.24568e-05	2.8036e-05	5.35037e-05	8.24986e-05	0.000765457	0.000491312	2.42632e-05	1.67121e-05	0.000163081	2.37288e-05	0.000442528	0.00012031	1.88914e-05	2.36403e-05	3.96823e-05	9.47675e-05	7.76988e-05	2.89847e-05	0.000121644	1.96677e-05	5.26422e-05	0.000109802	2.93285e-05	2.13628e-05	0.000350053	0.000175088	0.000183464	2.86828e-05	3.69897e-05	3.10698e-05	0.000145284					8.48095e-05
Positive_control	1.4411e-05	6.05043e-05	4.68794e-05	1.30974e-05	5.97905e-05	3.01226e-05	1.2972e-05	0.000100904	0.00134506	3.30211e-05	3.77795e-05	0.0032542	2.58197e-05	2.20279e-05	1.28079e-05	0.000186159	0.00338505	6.32801e-05	0.000206824	1.60118e-05	0.000822284	8.33204e-05	8.45505e-06	3.65032e-05	5.54226e-05	2.44926e-05	4.70034e-05	4.34074e-05	2.1735e-05	3.11899e-05	2.65414e-05	2.73041e-05	1.61106e-05	3.6763e-05	4.50807e-05	0.000225511	4.94041e-05	7.34273e-05	2.33086e-05	0.000192955	0.000646749	0.00196203	0.000552757	2.97002e-05	4.87637e-05	7.70388e-05	0.000402159	0.00136735	3.94207e-05
BL-99_low	6.32037e-05	2.00952e-05	0.00375837	0.000201644	1.55589e-05	0.00195207	4.49386e-05	9.55054e-05	0.000811525	1.88019e-05	0.0012064	9.40978e-05	0.000103483	1.92766e-05	3.9268e-05	1.63335e-05	0.00306417	0.00130984	0.00088028	1.2962e-05	4.03135e-05	1.79977e-05	4.24936e-05	0.00119252	0.000314221	0.000153766	2.44485e-05	0.00096082	0.00394815	9.42917e-05	0.000336826	2.94115e-05	0.000182868	0.00381685	0.0130137	0.00702984	0.00456426	0.00471023	2.2532e-05	6.6356e-05	0.000153683	0.000116341	0.00115179	0.000878591	0.000142841	0.000513772	0.00176871		4.03744e-05
BL-99_high	0.00405207	4.41088e-05	0.00161006	0.00914956	0.0568191	0.000425562	0.010335	0.000408049	0.00211856	0.00460559	0.000303501	0.00293733	0.000737092	2.72531e-05	3.3124e-05	7.24652e-05	4.23725e-05	0.000101358	0.00112566	0.000104895	4.52075e-05	0.00260587	0.00162973	0.0113423	0.000156183	0.00258362	0.0431364	0.00297267	0.00138032	0.0054871	0.0058363	0.00104797	0.0056832	0.00353742	0.00593045	0.000124451	1.9778e-05	0.000743135	3.04453e-05	0.0118012	5.56814e-05	0.00375585	5.36681e-05	0.000517505	0.000928634	2.46049e-05			0.000114553
s__Bifidobacterium_animalis（%）
Placebo	0.0159467	0.00220803	0.0408137	0.0040427	0.0013427	0.00623238	0.0281574	0.00287029	0.00277473	0.00580478	0.00246519	0.00255986	0.0161967	0.00524568	0.0028036	0.00535037	0.00824986	0.0765457	0.0491312	0.00242632	0.00167121	0.0163081	0.00237288	0.0442528	0.012031	0.00188914	0.00236403	0.00396823	0.00947675	0.00776988	0.00289847	0.0121644	0.00196677	0.00526422	0.0109802	0.00293285	0.00213628	0.0350053	0.0175088	0.0183464	0.00286828	0.00369897	0.00310698	0.0145284					0.00848095
Positive_control	0.0014411	0.00605043	0.00468794	0.00130974	0.00597905	0.00301226	0.0012972	0.0100904	0.134506	0.00330211	0.00377795	0.32542	0.00258197	0.00220279	0.00128079	0.0186159	0.338505	0.00632801	0.0206824	0.00160118	0.0822284	0.00833204	0.000845505	0.00365032	0.00554226	0.00244926	0.00470034	0.00434074	0.0021735	0.00311899	0.00265414	0.00273041	0.00161106	0.0036763	0.00450807	0.0225511	0.00494041	0.00734273	0.00233086	0.0192955	0.0646749	0.196203	0.0552757	0.00297002	0.00487637	0.00770388	0.0402159	0.136735	0.00394207
BL-99_low	0.00632037	0.00200952	0.375837	0.0201644	0.00155589	0.195207	0.00449386	0.00955054	0.0811525	0.00188019	0.12064	0.00940978	0.0103483	0.00192766	0.0039268	0.00163335	0.306417	0.130984	0.088028	0.0012962	0.00403135	0.00179977	0.00424936	0.119252	0.0314221	0.0153766	0.00244485	0.096082	0.394815	0.00942917	0.0336826	0.00294115	0.0182868	0.381685	1.30137	0.702984	0.456426	0.471023	0.0022532	0.0066356	0.0153683	0.0116341	0.115179	0.0878591	0.0142841	0.0513772	0.176871		0.00403744
BL-99_high	0.405207	0.00441088	0.161006	0.914956	5.68191	0.0425562	1.0335	0.0408049	0.211856	0.460559	0.0303501	0.293733	0.0737092	0.00272531	0.0033124	0.00724652	0.00423725	0.0101358	0.112566	0.0104895	0.00452075	0.260587	0.162973	1.13423	0.0156183	0.258362	4.31364	0.297267	0.138032	0.54871	0.58363	0.104797	0.56832	0.353742	0.593045	0.0124451	0.0019778	0.0743135	0.00304453	1.18012	0.00556814	0.375585	0.00536681	0.0517505	0.0928634	0.00246049			0.0114553
[truncated: 52 more columns]
