# Supplementary material for: Prolonged efficacy of Bifidobacterium lactis in the treatment of functional dyspepsia
Source: Research Square preprint supplement (doi:10.21203/rs.3.rs-2529681/v1), 2023-03-02
Supplement: Supplementary file 3 [file d3fc110f8d6b500299fd762a.docx]

**Table S 1** The clinical response rate of the average decrease in EPS+PDS, PDS, and EPS score of greater than 0.5 in functional dyspepsia (FD) patients from baseline to 4-week treatment, 8-week treatment, 2-week follow-up and 6-week questionnaire survey period among the four groups (Female)

| **Clinical response rate (%)†)** | | **Placebo (n = 32)** | **Positive_control (n = 38)** | **BL-99_low (n = 34)** | **BL-99_high (n = 33)** |
| --- | --- | --- | --- | --- | --- |
| **4-week treatment** | PDS+EPS | 68.8a（51.8 to 85.7） | 50.0a（33.3 to 66.7） | 52.9a（35.3 to 70.6） | 78.8a（64.1 to 93.5） |
| PDS | 71.9a（55.4 to 88.3） | 63.2a（47.1 to 79.2） | 70.6a（54.5 to 86.7） | 87.9a（76.1 to 99.6） |
| EPS | 46.9a（28.6 to 65.2） | 39.5a（23.2to 55.8） | 44.1a（26.5 to 61.7） | 69.7a（53.1 to 86.2） |
| **8-week treatment** | PDS+EPS | 56.3b（38.1 to 74.4） | 68.4b（52.9 to 83.9） | 76.5ab（61.4 to 91.5） | 93.9a（85.3 to 102.5） |
| PDS | 68.8b（51.8 to 85.7） | 76.3ab（62.2 to 90.5） | 79.4ab（65.1 to 93.7） | 90.9a（80.6 to 101.3） |
| EPS | 46.9b（28.6 to 65.2） | 50.0b（33.3 to 66.7） | 64.7ab（47.8 to 81.6） | 75.8a（60.3 to 91.2） |
| **2-week follow-up** | PDS+EPS | 68.8a（51.8 to 85.7） | 63.2a（47.1 to 79.2） | 82.4a（66.6 to 90.9） | 84.8a（71.9to 97.8） |
| PDS | 81.3a（67.0 to 95.5） | 76.3a（62.2 to 90.5） | 94.1a（85.8 to 102.5） | 90.9a（80.6 to 101.3） |
| EPS | 53.1a（34.8 to 71.4） | 52.6a（46.1 to 74.8） | 64.7a（47.8 to 81.6） | 72.7a（56.7 to 88.8） |
| **6-week questionnaire survey** | PDS+EPS | 12.5a（0.4 to 24.6） | 5.3a（-2.2 to 12.7） | 20.6a（6.3 to 34.9） | 30.3a（13.8 to 46.9） |
| PDS | 18.8a（4.5 to 33.0） | 28.9a（13.8 to 44.1） | 38.2a（21.0 to 55.4） | 36.4a（19.0 to 53.7） |
| EPS | 6.3a（-2.6 to 15.1） | 13.2a（1.9 to 24.4） | 11.8a（0.4 to 23.2） | 24.2a（8.8 to 39.7） |
| Data are estimate (95% CIs) in the full analysis set.  Placebo group: 2 g maltodextrin; Positive_control group: proton ­ pump inhibitor, 10 mg/ day; BL-99_low group: 1×1010 cfu/day BL-99; BL-99_high group: 5×1010 cfu/day BL-99.  The significance of the clinical response ratio between the two groups was counted by Chi-square test, in which different lowercase letters showed significant differences.  †) Clinical scores could range from 0 - 3 for PDS and EPS. PDS = postprandial distress syndrome (Including bloating and early satiety symptoms). EPS = epigastric pain syndrome (Including epigastric pain and epigastric burning symptoms). | | | | | |

**Table S 2** The clinical response rate of the average decrease in EPS+PDS, PDS, and EPS score of greater than 0.5 in functional dyspepsia (FD) patients from baseline to 4-week treatment, 8-week treatment, 2-week follow-up and 6-week questionnaire survey period among the four groups (Male)

| **Clinical response rate (%)†)** | | **Placebo (n = 13)** | **Positive_control (n = 10)** | **BL-99_low (n = 13)** | **BL-99_high (n = 12)** |
| --- | --- | --- | --- | --- | --- |
| **4-week treatment** | PDS+EPS | 46.2a（14.8 to 77.5） | 80.0a（49.8 to 110.2） | 69.2a（40.2 to 98.3） | 91.7a（73.3 to 110.0） |
| PDS | 53.8a（22.5 to 85.2） | 70.0a（35.4 to 104.6） | 84.6a（61.9 to 107.3） | 100.0a（100 to 100） |
| EPS | 69.2a（40.2 to 98.3） | 70.0a（35.4 to 104.6） | 69.2a（40.2 to 98.3） | 83.3a（53.1 to 86.2） |
| **8-week treatment** | PDS+EPS | 76.9b（50.4 to 103.4） | 80.0a（49.8 to 110.2） | 76.9b（50.4 to 103.4） | 100.0a（100 to 100） |
| PDS | 84.6b（61.9 to 107.3） | 90.0ab（67.4 to 112.6） | 84.6b（61.9 to 107.3） | 100.0a（100 to 100） |
| EPS | 69.2b（40.2 to 98.3） | 70.0a（35.4 to 104.6） | 61.5ab（30.9 to 92.1） | 83.3a（53.1 to 86.2） |
| **2-week follow-up** | PDS+EPS | 61.5a（30.9 to 92.1） | 80.0a（49.8 to 110.2） | 69.2a（40.2 to 98.3） | 100.0a（100 to 100） |
| PDS | 69.2a（40.2 to 98.3） | 80.0a（49.8 to 110.2） | 76.9a（50.4 to 103.4） | 100.0a（100 to 100） |
| EPS | 69.2a（40.2 to 98.3） | 90.0a（67.4 to 112.6） | 69.2a（40.2 to 98.3） | 100.0a（100 to 100） |
| **6-week questionnaire survey** | PDS+EPS | 38.5a（7.9 to 69.1） | 40.0a（3.1 to 76.9） | 23.1a（-0.34 to 49.6） | 41.7a（8.9 to 74.4） |
| PDS | 38.5a（7.9 to 69.1） | 40.0a（3.1 to 76.9） | 23.1a（-0.34 to 49.6） | 41.7a（8.9 to 74.4） |
| EPS | 23.1a（-3.4 to 49.6） | 30.0a（-4.6 to 64.6） | 7.7a（-0.91 to 24.5） | 41.7a（8.9 to 74.4） |
| Data are estimate (95% CIs) in the full analysis set.  Placebo group: 2 g maltodextrin; Positive_control group: proton ­ pump inhibitor, 10 mg/ day; BL-99_low group: 1×1010 cfu/day BL-99; BL-99_high group: 5×1010 cfu/day BL-99.  The significance of the clinical response ratio between the two groups was counted by Chi-square test, in which different lowercase letters showed significant differences.  †) Clinical scores could range from 0 - 3 for PDS and EPS. PDS = postprandial distress syndrome (Including bloating and early satiety symptoms). EPS = epigastric pain syndrome (Including epigastric pain and epigastric burning symptoms). | | | | | |

**Table S 3** Adverse events

| **Group** | | **Placebo (n = 50)** | **Positive_control (n = 50)** | **BL-99_low (n = 50)** | **BL-99_high (n = 50)** |
| --- | --- | --- | --- | --- | --- |
| **Number of patients with adverse events** | | 2（4.0%） | 1（2.0%） | 1（2.0%） | 1（2.0%） |
| Digestive system |  |  |  |  |  |
|  | Bloating |  |  | 1（2.0%）†) |  |
|  | Nausea |  |  |  | 1（2.0%）†) |
|  | Diarrhea | 1（2.0%）†) |  |  |  |
| Skin and subcutaneous tissue |  |  |  |  |  |
|  | Pruritus | 1（2.0%）*‡) |  |  |  |
| Other |  |  |  |  |  |
|  | Cardiac disorders |  | 1（2.0%）*‡) |  |  |
| Data are n (%) for the full analysis set. *) Unlikely to be related to study product. †)Possibly related to study product; All adverse events in the first 8 weeks were mild (grade 1) or moderate (grade 2); ‡) Denotes adverse events leading to discontinuation. | | | | | |

**Table S 4** Gene information related to the adhesion function of probiotics

| **Gene ID** | **Gene Name** | **Start** | **End** | **Length (bp)** | **Putative function(s)** | **Reference** |
| --- | --- | --- | --- | --- | --- | --- |
| gene0159 | cpaF | 186340 | 187407 | 1068 | pilus assembly protein CpaF | [1] |
| gene0160 | tadB | 187407 | 188063 | 657 | tight adherence protein B |
| gene1459 | - | 1589152 | 1587971 | 1182 | UPF0755 protein | [2] |
| gene2119 | - | 2286217 | 2285573 | 645 | NlpC/P60 family protein |
| gene1198 | talA | 1339670 | 1338567 | 1104 | Transaldolase |
| gene0786 | groEL | 846204 | 847829 | 1626 | Chaperonin GroEL |
| gene0568 | - | 601817 | 602923 | 1107 | Outer membrane-specific lipoprotein transporter s ubunit LolE |
| gene0066 | - | 77891 | 79129 | 1239 | Sortase E | [3] |
| gene0110 | srtA | 126202 | 127179 | 978 | Sortase C |
| gene0168 | - | 196674 | 195541 | 1134 | Sortase C |
| gene1631 | - | 1771060 | 1772007 | 948 | Sortase C |


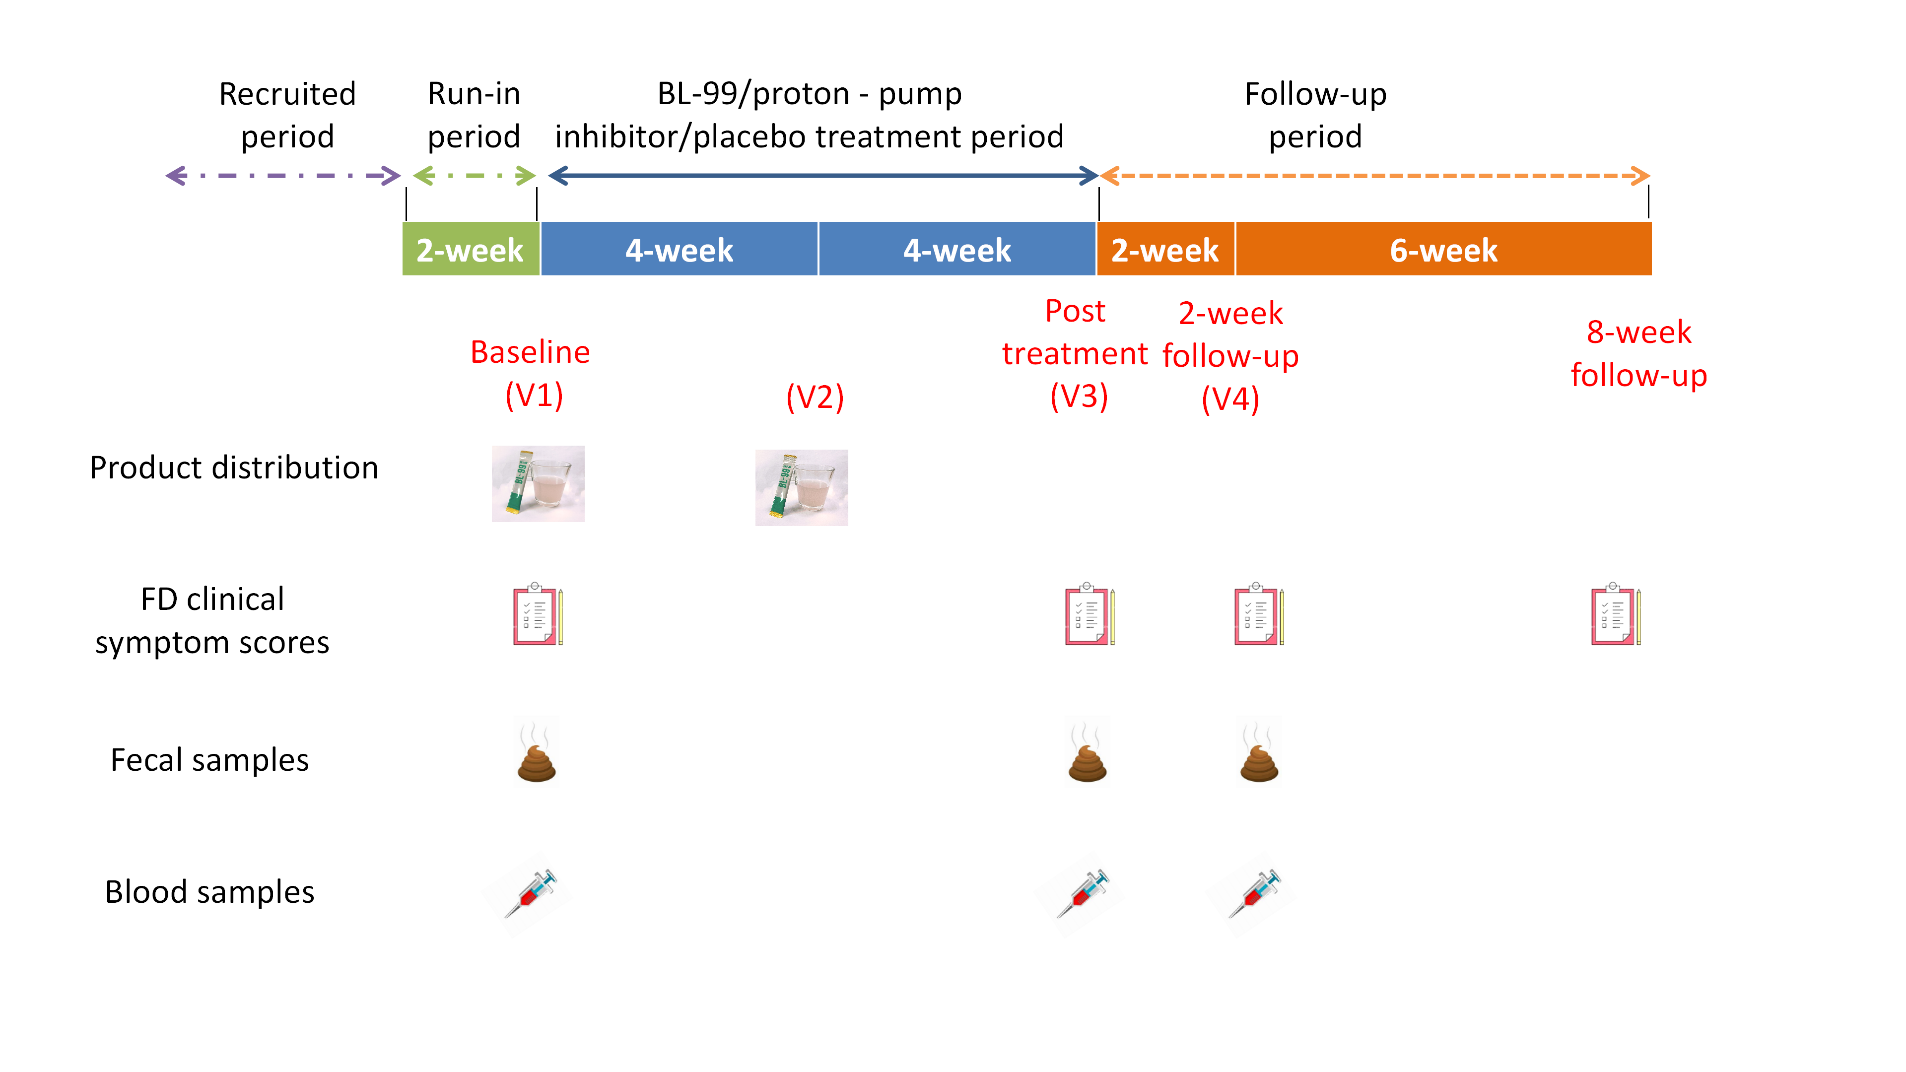


**Figure S 1** The study design of the human trial


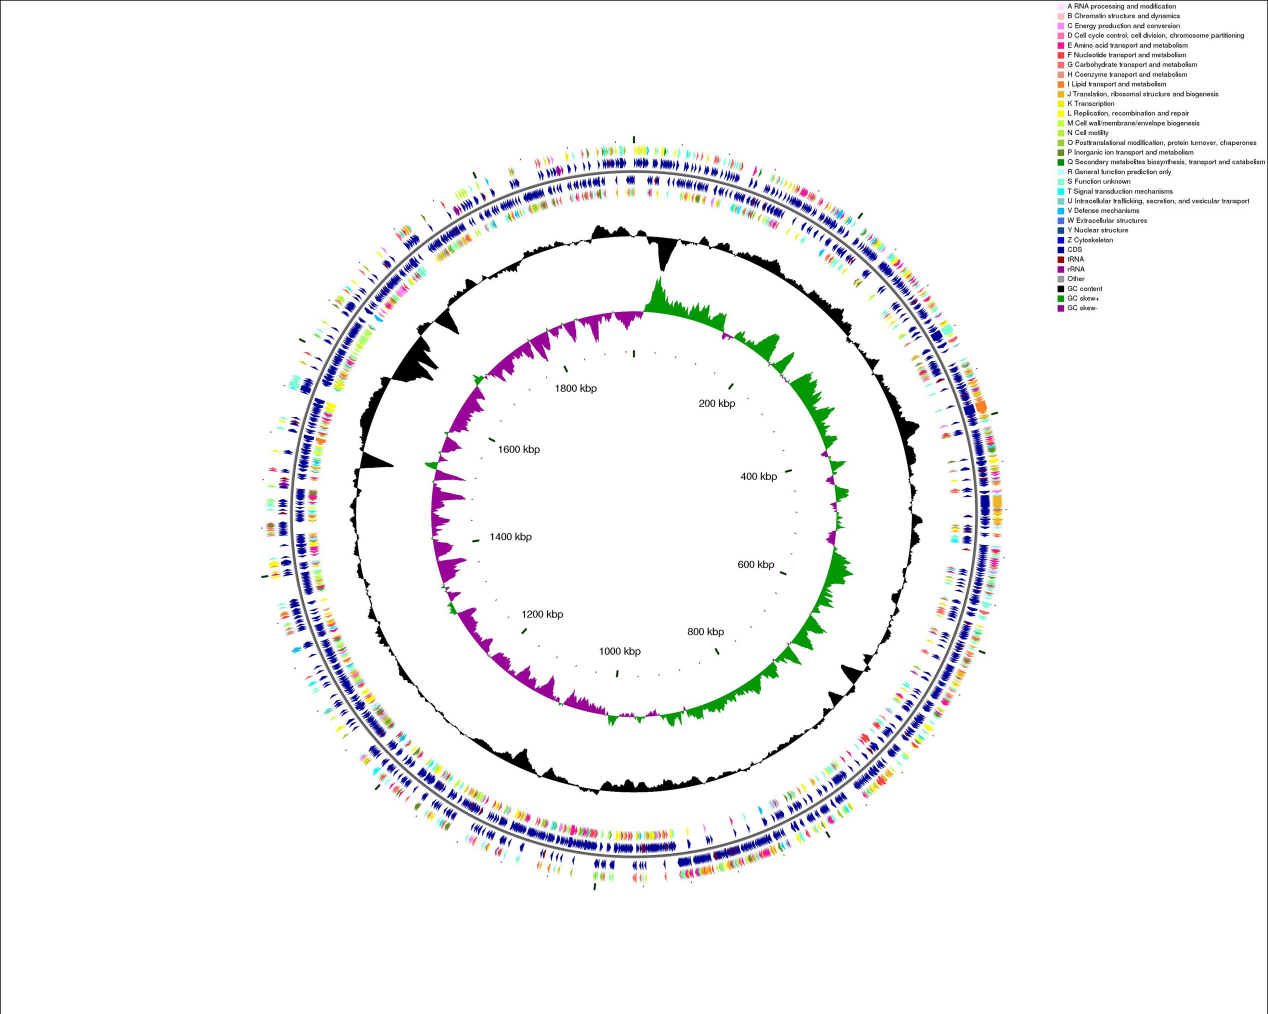


**Figure S 2** The 16s gene map of *Bifidobacterium lactis* BL-99

**Supplementary Methods**

***Metagenomic Analysis***

Of the 185 participants who completed the entire trial, 94.6% of them had complete fecal samples and gut microbiota data. Due to the small percentage of missing data (about 5%), the missing values were not filled in and only the complete data were analyzed. For paired-end metagenomic sequencing and library construction, we used the llumina NovaSeq (Illumina Inc., San Diego, CA, USA) platform at Majorbio Bio-Pharm Technology Co., Ltd. (Shanghai, China) as previously described.[4] In brief, total genomic DNA was extracted from human feces using the E.Z.N.A.® Soil DNA Kit (Omega Bio-tek, Norcross, GA, U.S.) according to manufacturer’s instructions. And all the concentration and purity of total genomic DNA were determined by TBS-380 micro fluorometer (Turner Bio Systems, USA) and NanoDrop2000 ultra-micro spectrophotometer (Thermo Fisher Scientific, USA) respectively. Online platforms fastp 0.20.0 (https://github.com/OpenGene/fastp) and BWA 0.7.9a (http://bio-bwa.sourceforge.net) were used to remove the human feces originated reads to obtain clean reads for subsequent analysis.[5] Diamond 0.8.35 (http://www.diamondsearch.org/index.php) was used to compare the amino acid sequence of the non-redundant gene set with the NR database (e-value = 1e-5), and the species annotation was obtained from the taxonomic information database corresponding to the NR database. Then, the abundance of the species was calculated using the sum of the gene abundance of the corresponding species.[6]

In addition, Gut microbial dissimilarities between groups at the genus level were visualized by Principal Co-ordinates Analysis (PCoA), using Bray_Curtis dissimilarities based on species profiles (PCoA function, R 3.3.2, ape package). Alpha diversity including Sobs, Shannon and Simpson diversity indexs were caculated to evaluate the community richness and diversity. The KEGG, EggNOG, CAZy, Quorum sensing (QS) and Probio function annotation also adopted a similar method, and compared it with the corresponding database to obtain the relevant function corresponding to the gene. The Spearman-grade correlation coefficients between different groups of microorganisms and metabolites were calculated using the psych package of R statistical software (http://cran.r-project.org/).

***Non-target metabolic***

Fecal metabolites extration and analysis followed a published method with modification[7]. Brifely, 200 mg fecal sample, 1.5 g sodium chloride, 3 mL distilled water and 20 μL internal standard solution (7.55 mg/L 2-methyl-3-heptanone) were added to a 20 mL headspace vail, and then vortexed well. Quilibration for 15 min at 65°C, the solid-phase microextraction (SPME) fiber (DVB/CAR/PDMS, 50/30 μm, Supelco, Bellefonte, PA, USA) was placed in the headspace for 30 min. Then, the SPME fiber with the analytes was adsorbed and analysed by Agilent gas chromatography quadrupole-time-of-flight mass spectrometer (GC-Q-TOF, 7200-7890B, Agilent Thechnologies, Santa Clara, CA, USA) with Agilent DB-WAX capillary column (30 m × 250 μm × 0.25 μm). The column temperature for the detection of the fecal sample was initially set at 40°C for 1 min, increased by 8°C/min to 120°C, then increased by 5°C/min until reaching 230°C, held for 10 min, with the total time of 43 min. The other conditions of MS were set as follows: the carrier gas was helium gas at a constant flow rate of 1 mL/min, the collision voltage was 70 eV, and the ion source temperature was set at 230°C. The mass spectrum scan range was 40–400 *m/z*.

The data sets were processed for peak pick and deconvolution with Unknowns Analysis tool of the MassHunter Quantitative Analysis software package (B.10.1, Agilent Technologies). Mass Profiler Professional Software (MPP) (version 14.5, Agilent Technologies) was used for alignment, normalization and annotation. The mass spectra of volatile substances were matched to the reference mass spectra in the NIST17 library, and those with a matching factor above 75 were selected for data processing. Alignment was based on the *m/z* and retention time, and quantitation normalization was based on the peak area of the internal standard.

***Short Chain Fatty Acids (SCFAs) Measures***

Short chain fatty acids (SCFAs) were detected using the gas chromatography method as described in previous study.[8] Briefly, 50 μL 50% sulfuric acid was added to the 20 mg fecal sample/ 20 μL serum, and the homogenizer was used to homogenize the sample for 3min at 4°C (6 cycle; 30 s/c; pause for 10 s). Then 10 μL internal standard (2.927 mmol/L 2-ethylbutyric acid) and 500 μL ether were added and homogenized for 1 min (2 cycle; 30 s/c; pause for 5 s). Centrifugation was performed at 14000 rpm for 5 min at 4°C, and 350 μL supernatant was taken. After that, 350 μL supernatant were taken by centrifuging at 14000 r/min for 5 min (4°C). 500μL ether was added to the precipitation solution, and 400 μL supernatant were taken after homogenizing and centrifuging. Finally, the mixed supernatant was filtered by 0.22 μm filter membrane, and injected into a brown sample bottle for Agilent GC-8860 gas chromatograph analysis.

Chromatographic conditions: HP-FFAP column (30 m*250 μm *0.25 μm, Agilent Technologies, Inc.); Carrier gas: high-purity nitrogen; Column flow rate: 1 mL/min; Temperature of FID detector: 250℃, H2, air and tail air flow were set as 30, 400 and 25 mL/min respectively. The injection volume was 1 μL, and the temperature program was as follows:

**Reference**

[1] Westermann C, Gleinser M, Corr S C, et al. A critical evaluation of Bifidobacterial adhesion to the host tissue[J]. Front Microbiol, 2016,7:1220.

[2] Zhu D, Sun Y, Huo G, et al. Complete genome sequence of *Bifidobacterium animalis* subsp*.* lactis KLDS 2.0603, a probiotic strain with digestive tract resistance and adhesion to the intestinal epithelial cells[J]. Journal of Biotechnology, 2016,220:49-50.

[3] Sundararaman A, Bansal K, Sidhic J, et al. Genome of Bifidobacterium longum NCIM 5672 provides insights into its acid-tolerance mechanism and probiotic properties[J]. Archives of microbiology, 2021,203(10):6109-6118.

[4] Wang X, Sun G, Feng T, et al. Sodium oligomannate therapeutically remodels gut microbiota and suppresses gut bacterial amino acids-shaped neuroinflammation to inhibit Alzheimer's disease progression[J]. Cell Res, 2019,29(10):787-803.

[5] Li D, Liu C M, Luo R, et al. MEGAHIT: an ultra-fast single-node solution for large and complex metagenomics assembly via succinct de Bruijn graph[J]. Bioinformatics, 2015,31(10):1674-1676.

[6] Buchfink B, Xie C, Huson D H. Fast and sensitive protein alignment using DIAMOND[J]. Nat Methods, 2015,12(1):59-60.

[7] Tian H, Li S, Wen H, et al. Volatile organic compounds fingerprinting in faeces and urine of Alzheimer's disease model SAMP8 mice by headspace-gas chromatography-ion mobility spectrometry and headspace-solid phase microextraction-gas chromatography-mass spectrometry[J]. Journal of Chromatography A, 2020,1614:460717.

[8] Zhao L, Zhang F, Ding X, et al. Gut bacteria selectively promoted by dietary fibers alleviate type 2 diabetes[J]. Science, 2018,359(6380):1151-1156.
